# Supplementary material for: Structural and Biofunctional Insights into the Cyclo(Pro-Pro-Phe-Phe-) Scaffold from Experimental and In Silico Studies: Melanoma and Beyond
Source: MDPI journal article supplement (doi:10.3390/ijms23137173), 2022-06-28
Supplement: s1 [file s1]

# Structural and Biofunctional Insights into the Cyclo(Pro-Pro-Phe-Phe-) Scaffold from Experimental and In Silico Studies: Melanoma and Beyond

Joanna Bojarska<sup>1\*</sup>, Martin Breza<sup>2</sup>, Milan Remko<sup>3</sup>, Małgorzata Czyż<sup>4</sup>, Anna Gajos-Michniewicz<sup>4</sup>, Michał Zimecki<sup>5</sup>, Krzysztof Kaczmarek<sup>6</sup>, Izabela D. Madura<sup>7</sup>, Jakub M. Wojciechowski<sup>8</sup>, and Wojciech M. Wolf<sup>1</sup>

<sup>1</sup> Institute of Ecological and Inorganic Chemistry, Faculty of Chemistry, Lodz University of Technology, Żeromskiego 116, 90-924 Lodz, Poland

<sup>2</sup> Department of Physical Chemistry, Slovak Technical University, Radlinskeho 9, SK-81237 Bratislava, Slovakia

<sup>3</sup> Remedika, Luzna 9, SK-85104 Bratislava, Slovakia

<sup>4</sup> Department of Molecular Biology of Cancer, Medical University of Lodz, Poland

<sup>5</sup> Institute of Immunology and Experimental Therapy, Polish Academy of Sciences, ul. Weigla 12, 53-112 Wrocław, Poland

<sup>6</sup> Institute of Organic Chemistry, Faculty of Chemistry, Lodz University of Technology, Żeromskiego 116, 90-924 Lodz, Poland

<sup>7</sup> Warsaw University of Technology, Faculty of Chemistry, Poland

<sup>8</sup> Rigaku Europe SE-Hugenottenallee 167, 63263, Neu-Isenburg, Germany

\* Correspondence: joanna.bojarska@p.lodz.pl

## Supplementary Materials

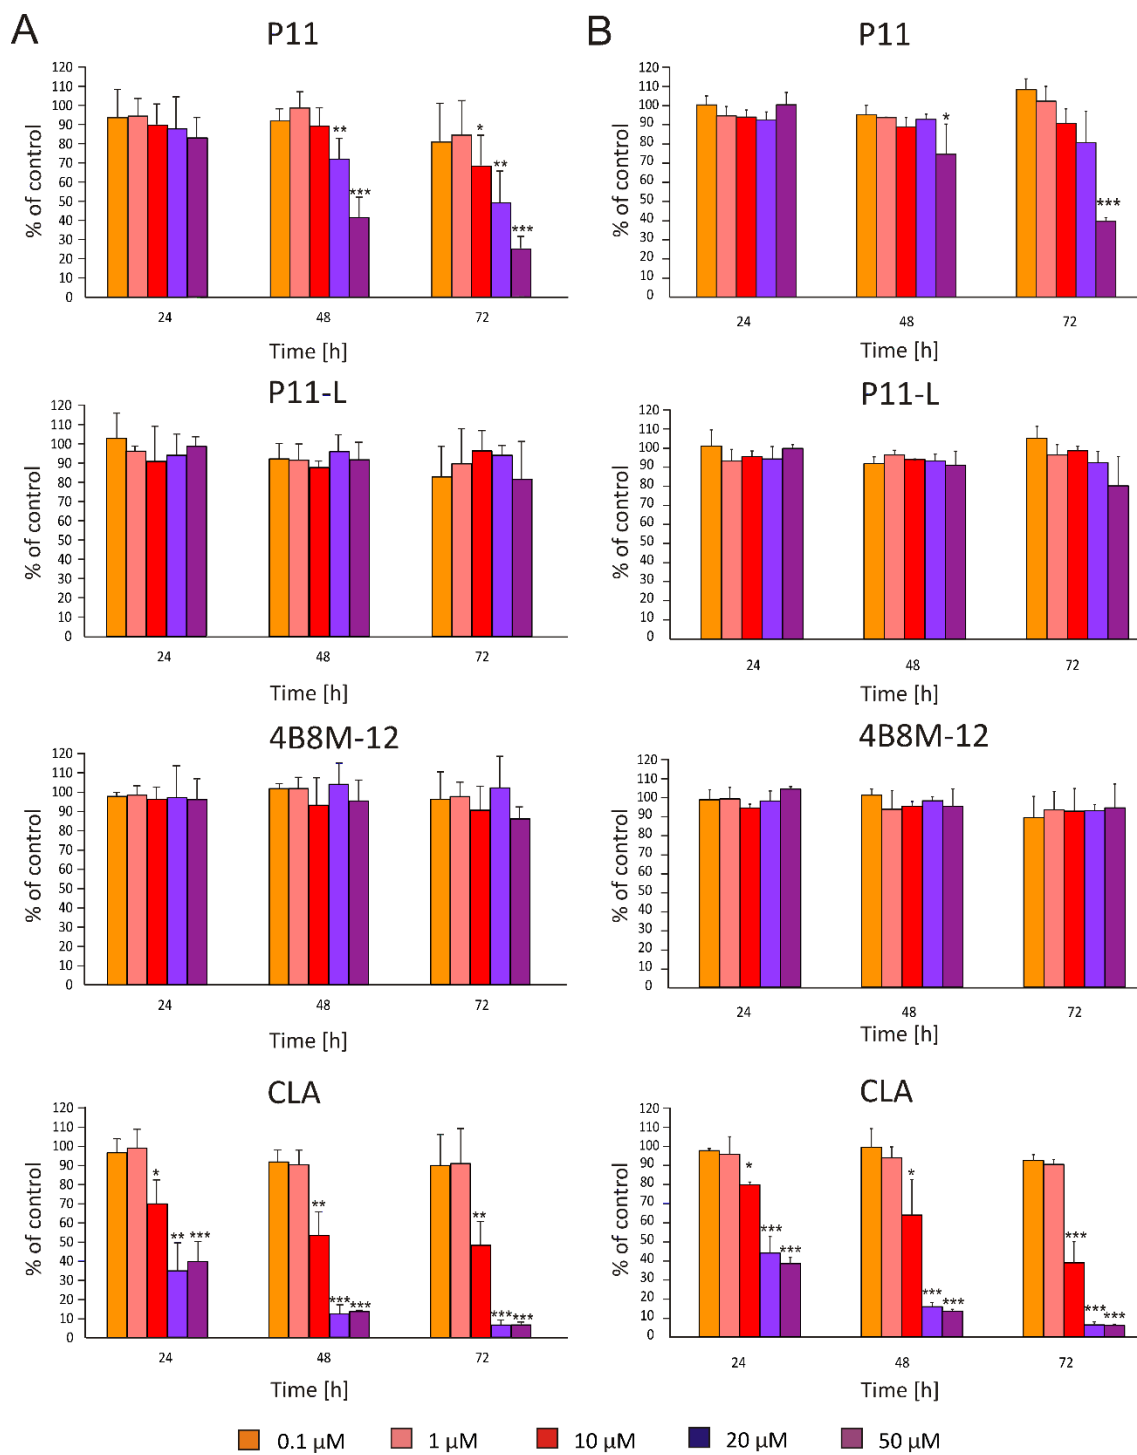

**Figure S1.** Viability of DMBC29 cells (panel A) and DMBC28 cells (panel B) treated with short peptides assessed in APA assay and expressed as % of control. Bars represent mean values of three biological replicates  $\pm$  SD. Statistically significant differences are indicated as \*  $p < 0.05$ ; \*\*  $p < 0.005$ ; \*\*\*  $p < 0.001$ .

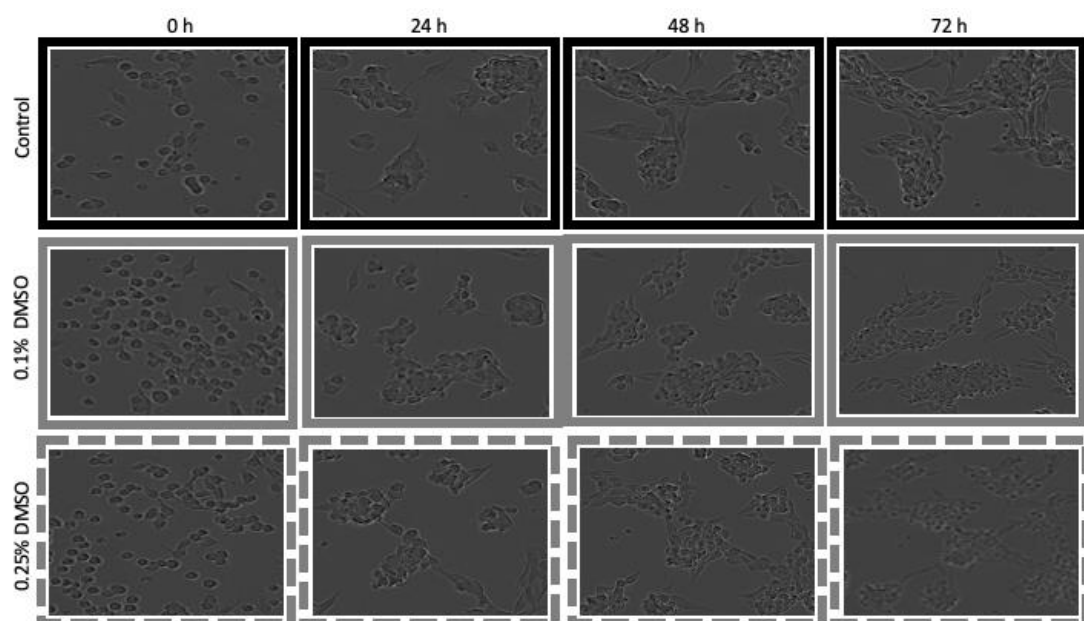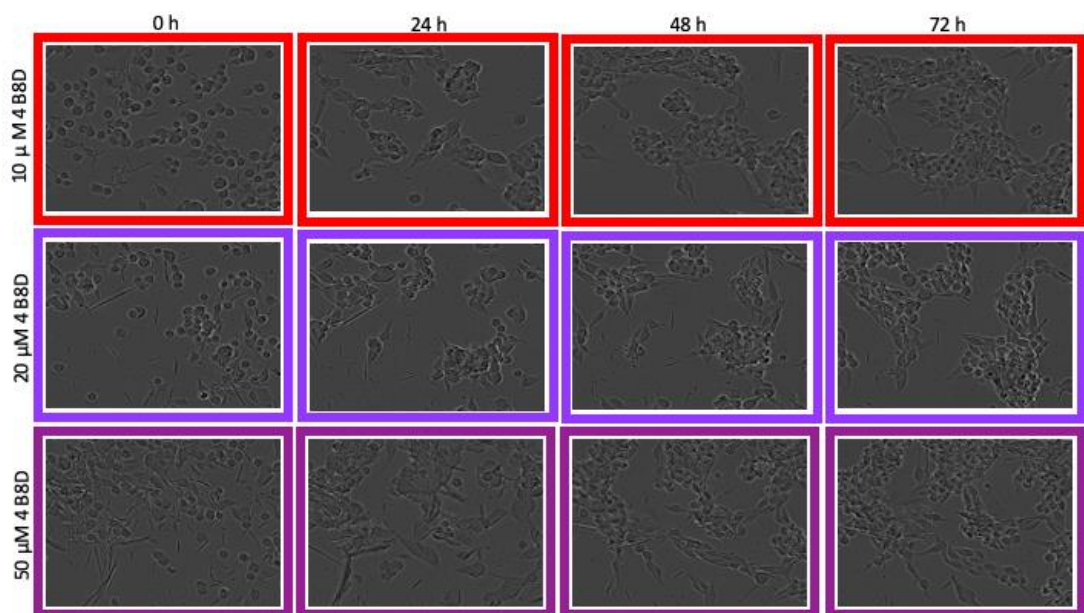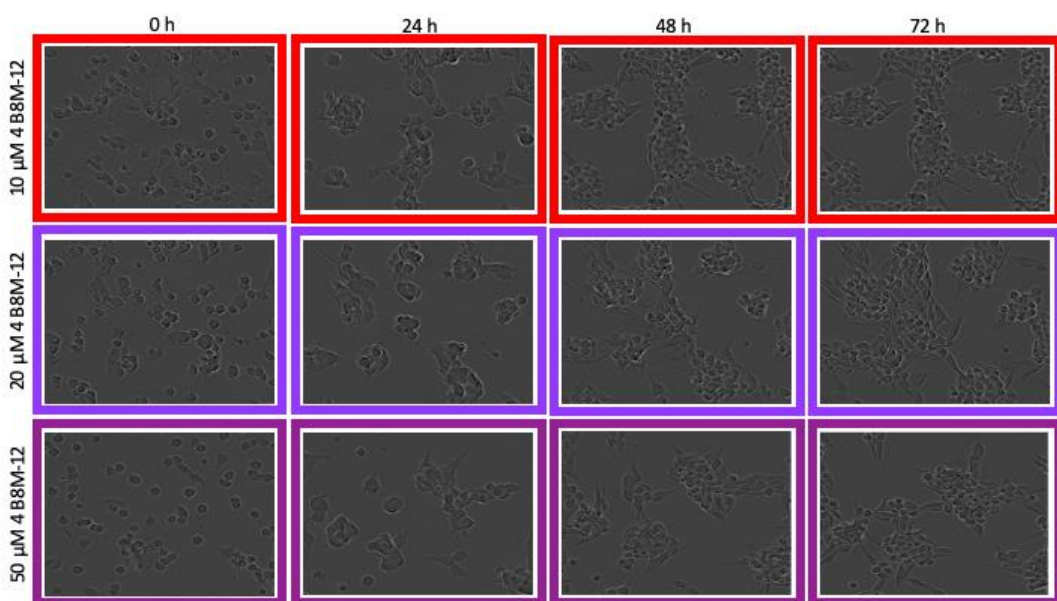

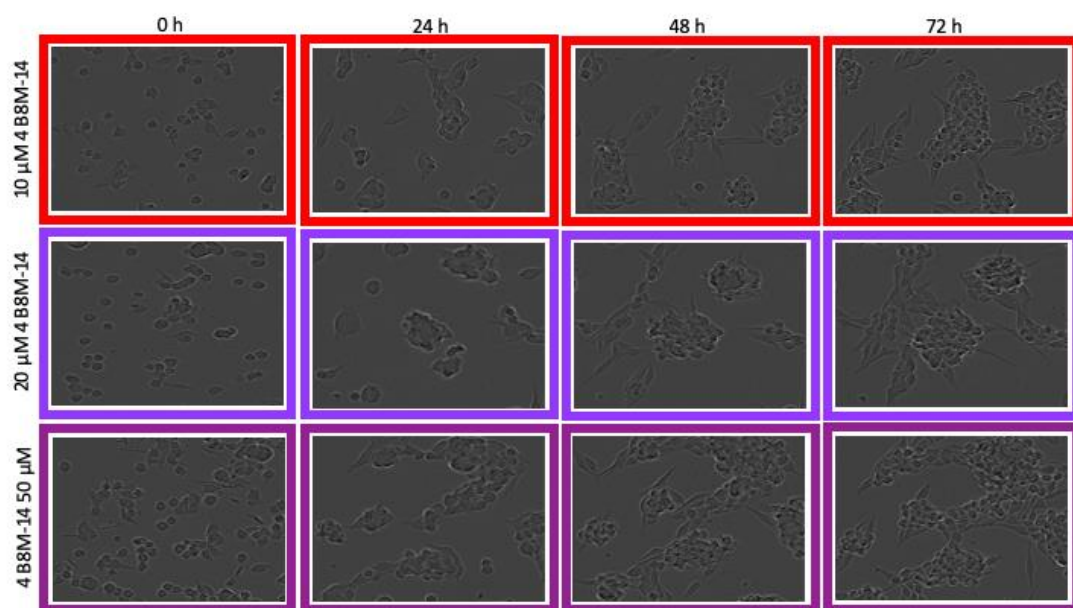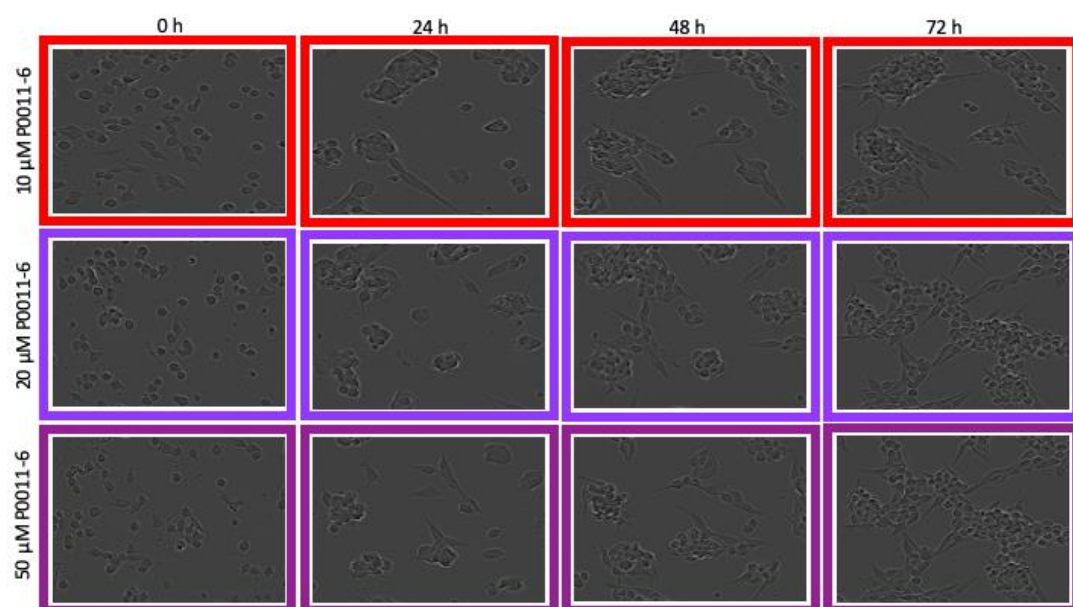

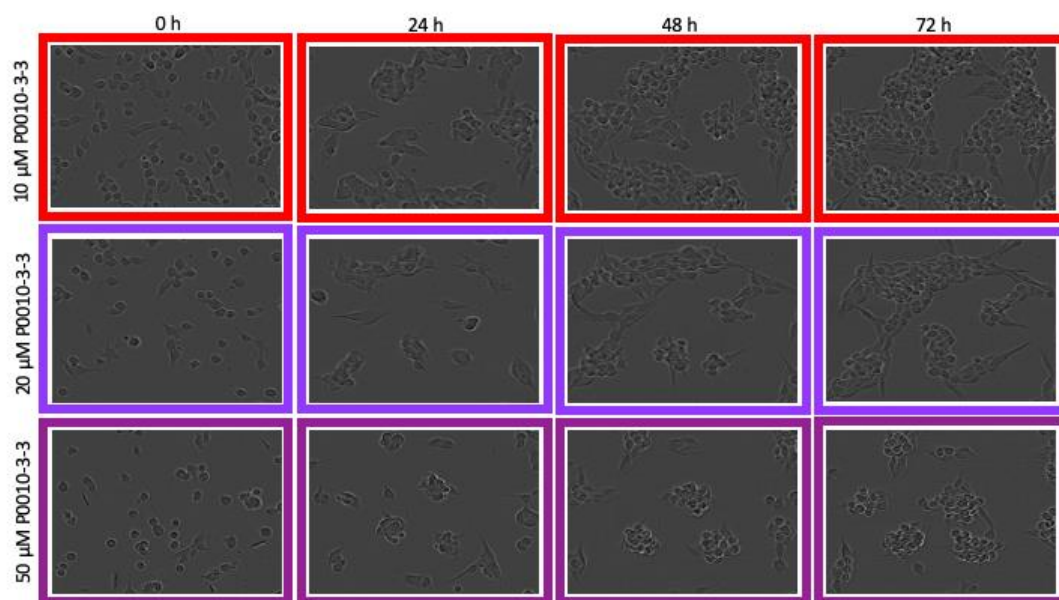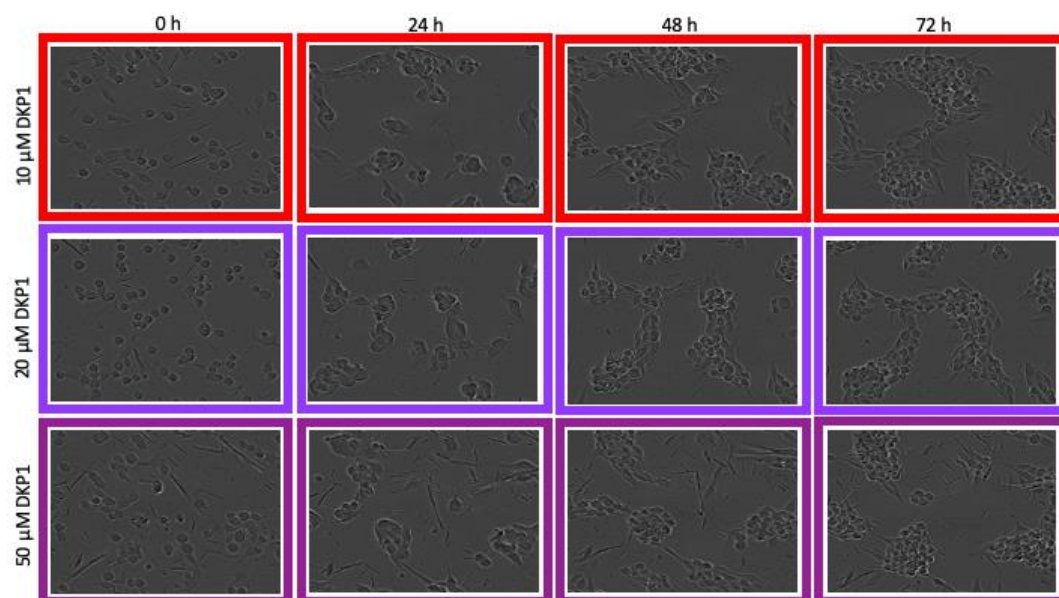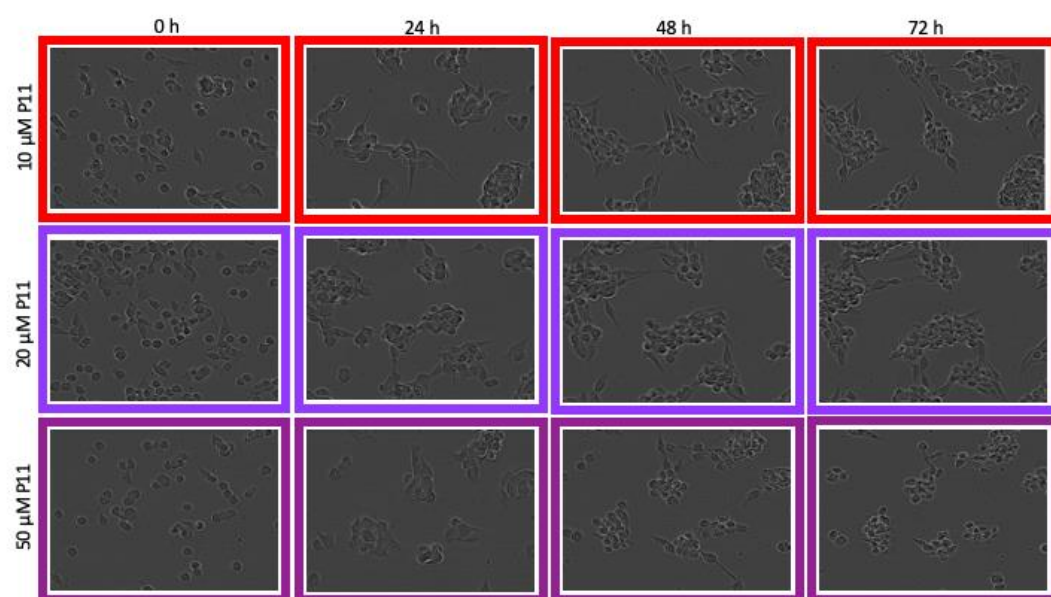



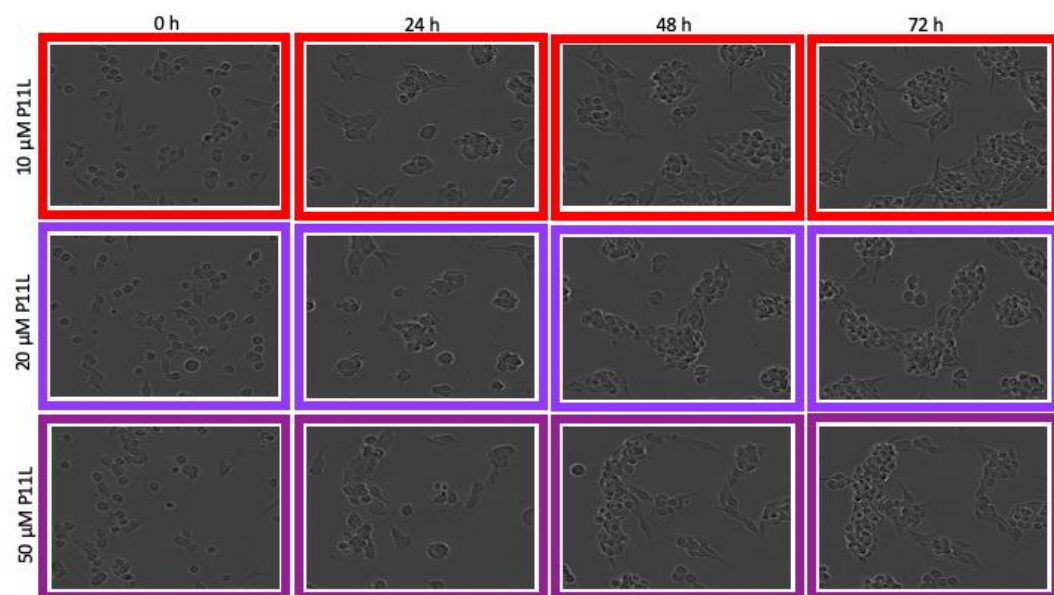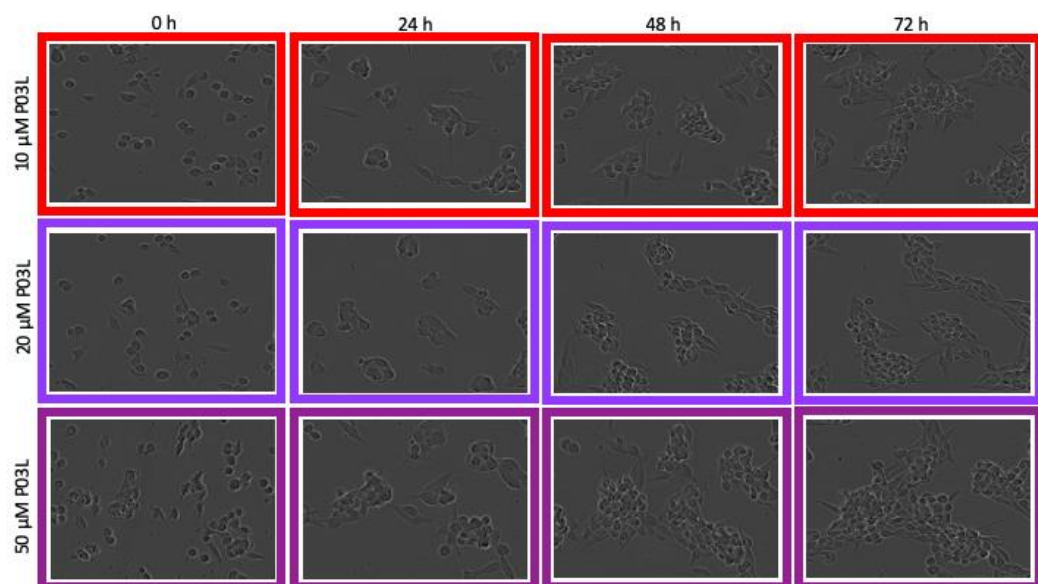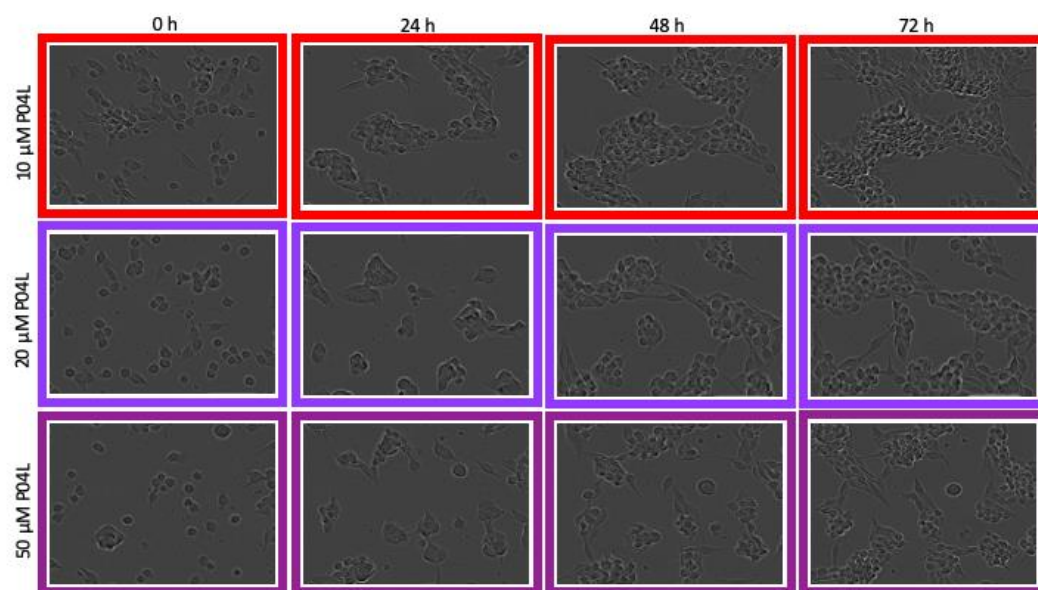

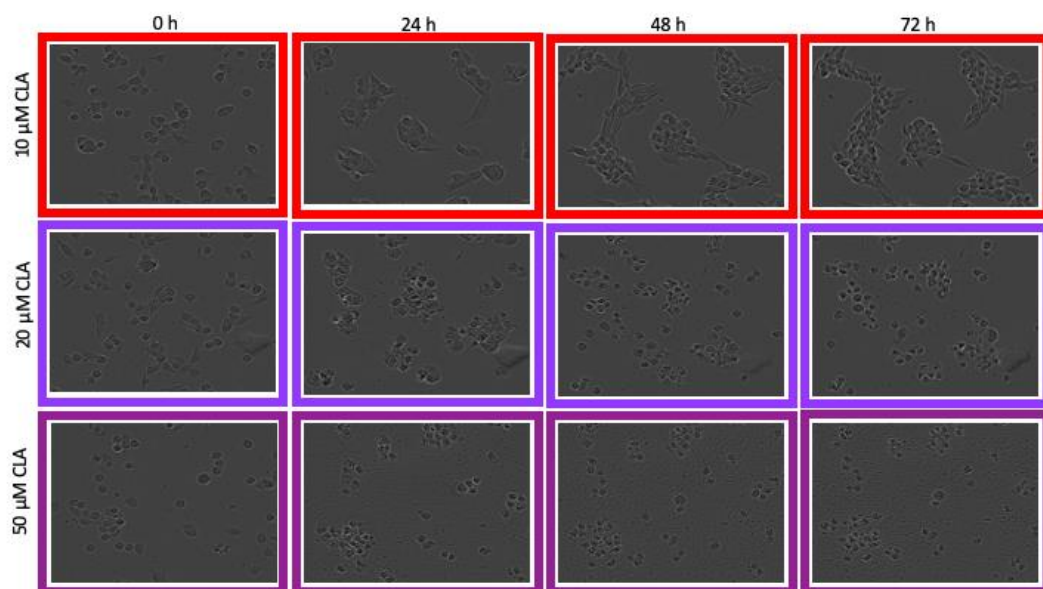

**Figure S2.** DMBC29 cells were exposed to a vehicle (0.1%; 0.25% DMSO) or short peptides at different concentrations (color framed) for 24, 48 and 72 h. The microphotographs were taken under the microscope in IncuCyte.

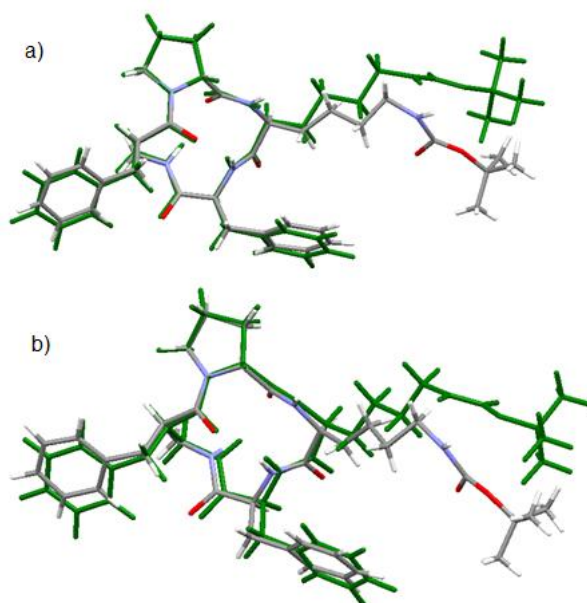

**Figure S3.** Superposition of the the X-ray structure of X-ray\_structure of JOC ArvidssonYEPVIZ and the B3LYP optimized YEPVIZ in the gas phase (a) and B3LYP optimized solvated YEPVIZ (b). The optimized structures are in green.

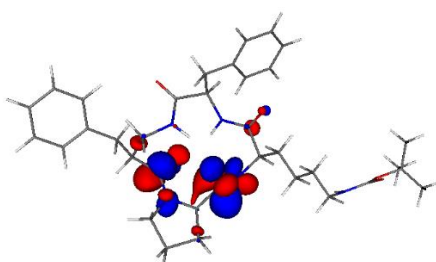

LUMO

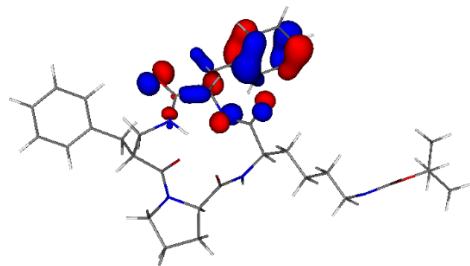

HOMO

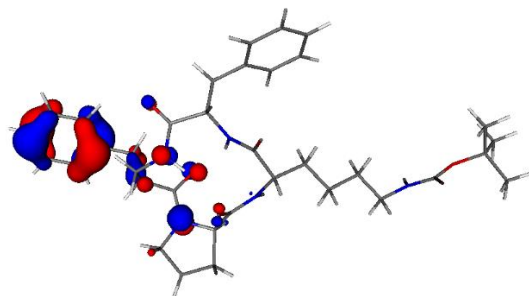

HOMO - 1

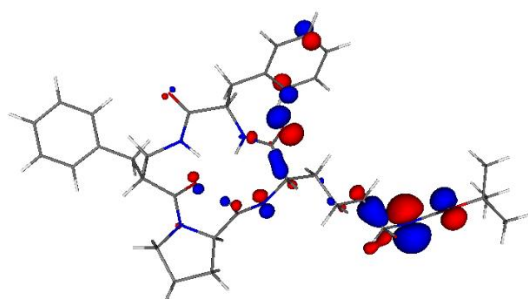

HOMO - 2

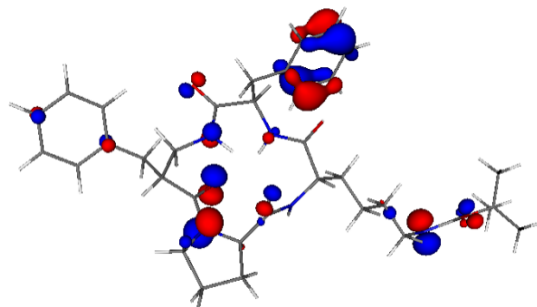

HOMO - 3

**Figure S4.** Frontier MOs of YEPVIZ (0.05 a.u. isosurface).



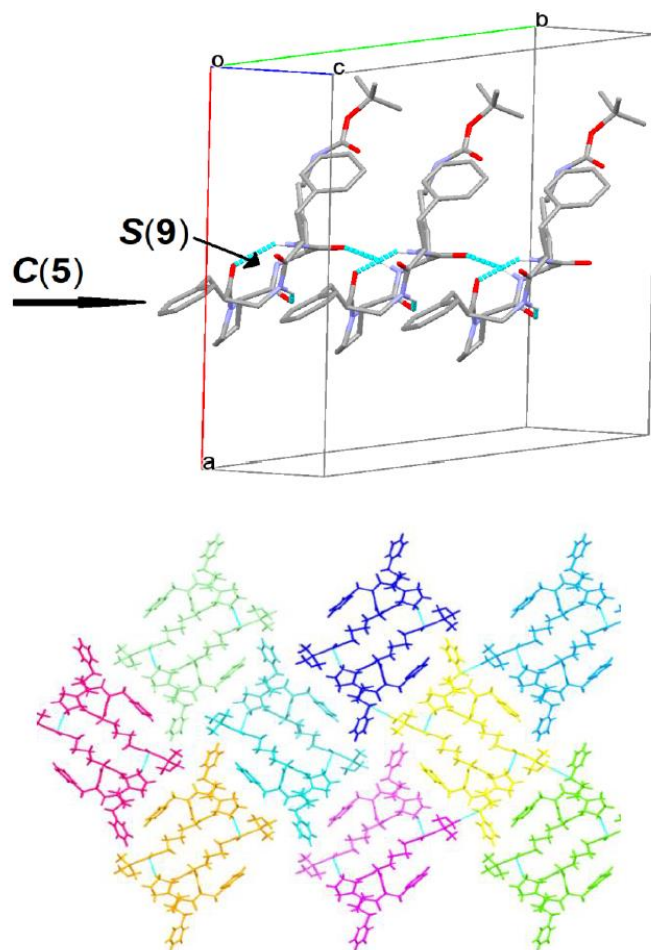

**Figure S5.** YEPVIZ – pseudo-hexagonal packing of 1D ladder-like LSAMs. Each LSAM has a different colouring.

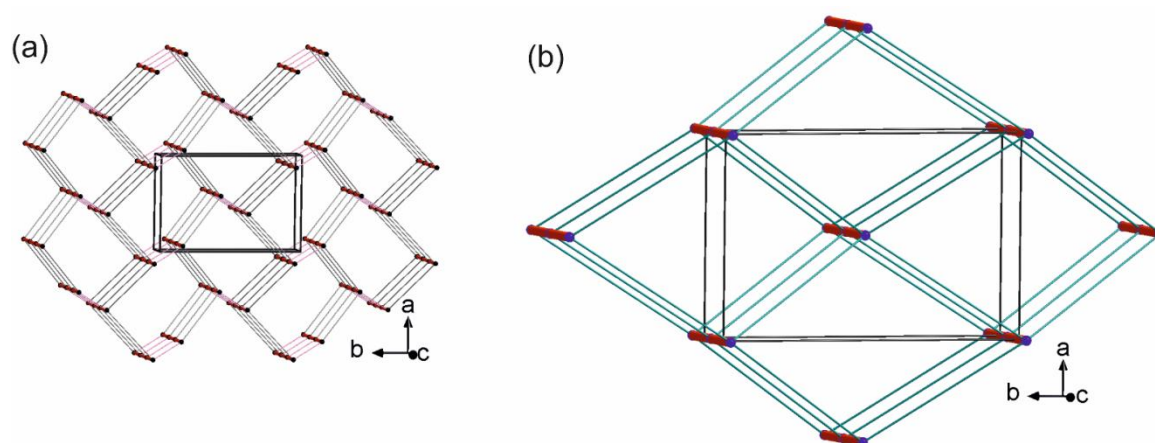

**Figure S6.** a) Simplified packing in YEPVIZ. Molecules are reduced to their centre of gravity, solid red lines show the strongest hydrogen bonds while thin pink and gray are in line with C-H $\cdots$ O and C-H $\cdots$  $\pi$  interactions, respectively. b) Blue dots (nodes) represent the centre of gravity of a dimer formed by weak C-H $\cdots$ O interactions, i.e. a LSAMs. Lines show the connections *via* weak interactions. The topology of this network is similar to pcu.

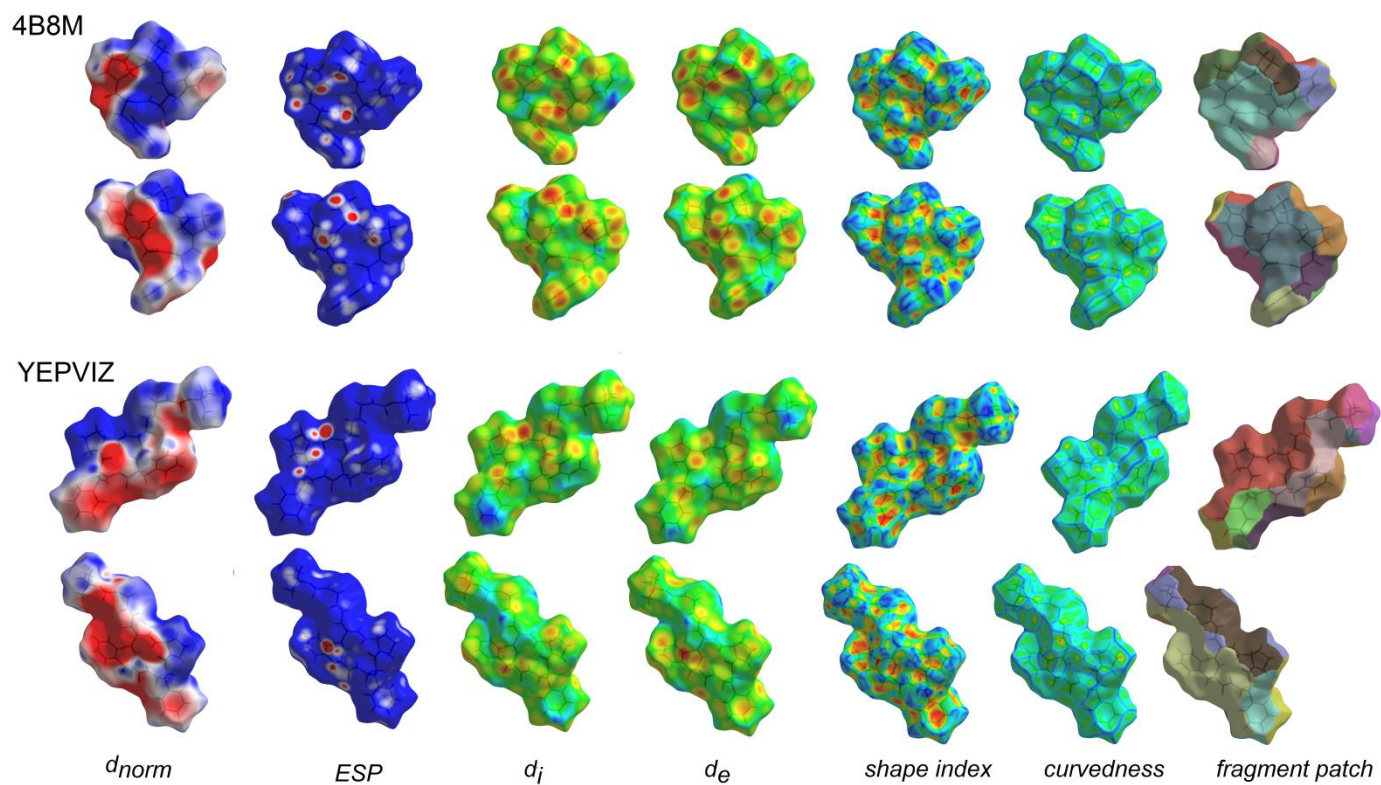

**Figure S7.** View of the 3D Hirshfeld surface of 4B8M and YEPVIZ mapped with  $d_{norm}$ ,  $d_i$ ,  $d_e$ , shape index, curvedness and fragment patch.

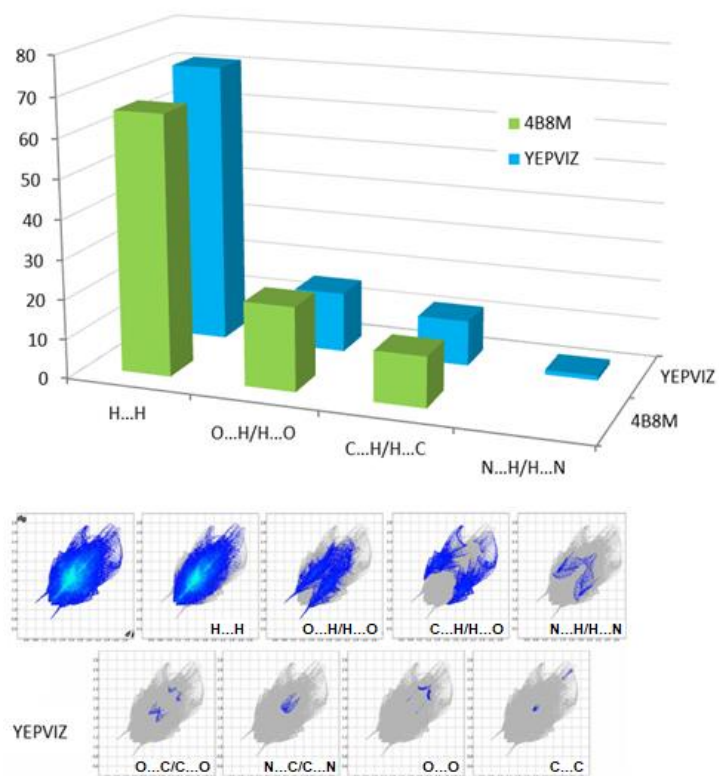

**Figure S8.** Comparison of inter-contacts contribution into both crystals ( $> 0.5\%$ ) and fingerprint plots of YEPVIZ.

|   |                   |       |                  | E_ele | E_pol | E_dis | E_rep | E_tot |
|---|-------------------|-------|------------------|-------|-------|-------|-------|-------|
| 0 | x+1/2, -y+1/2, -z | 11.56 | B3LYP/6-31G(d,p) | -9.2  | -2.9  | -43.5 | 22.1  | -36.0 |
| 1 | -x, -y, z         | 11.55 | B3LYP/6-31G(d,p) | -2.7  | -1.8  | -14.9 | 7.1   | -12.8 |
| 1 | -x, -y, z         | 9.77  | B3LYP/6-31G(d,p) | 10.2  | -4.4  | -67.4 | 29.8  | -32.8 |
| 2 | x+1/2, -y+1/2, -z | 11.49 | B3LYP/6-31G(d,p) | -10.1 | -1.9  | -36.1 | 14.8  | -34.4 |
| 0 | -x+1/2, y+1/2, -z | 17.05 | B3LYP/6-31G(d,p) | -9.7  | -2.1  | -16.8 | 0.0   | -26.5 |
| 2 | -x+1/2, y+1/2, -z | 17.00 | B3LYP/6-31G(d,p) | -0.4  | -0.7  | -17.2 | 0.0   | -16.0 |
| 0 | -x, -y, z         | 19.96 | B3LYP/6-31G(d,p) | 2.5   | -0.2  | -3.3  | 0.0   | -0.4  |
| 0 | -x, -y, z         | 20.23 | B3LYP/6-31G(d,p) | -0.4  | -0.1  | -2.1  | 0.0   | -2.3  |

-----  
Scale factors for benchmarked energy models  
See Mackenzie et al. IUCrJ (2017)  
-----

| Energy Model                                     | k_ele | k_pol | k_disp | k_rep |
|--------------------------------------------------|-------|-------|--------|-------|
| CE-HF ... HF/3-21G electron densities            | 1.019 | 0.651 | 0.901  | 0.811 |
| CE-B3LYP ... B3LYP/6-31G(d,p) electron densities | 1.057 | 0.740 | 0.871  | 0.618 |

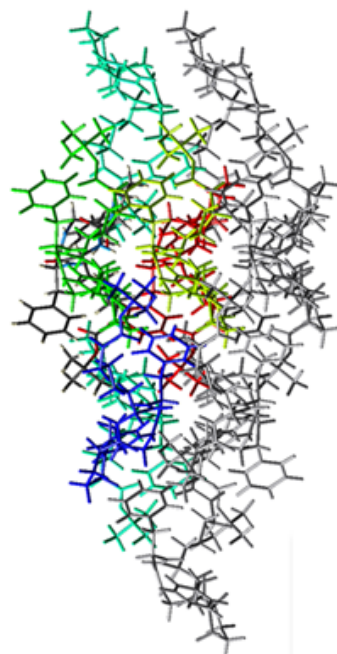

**Figure S9.** Interaction energies of the molecular pairs in terms of the energy frameworks of 4B8M (scale factors for benchmarked energy models).

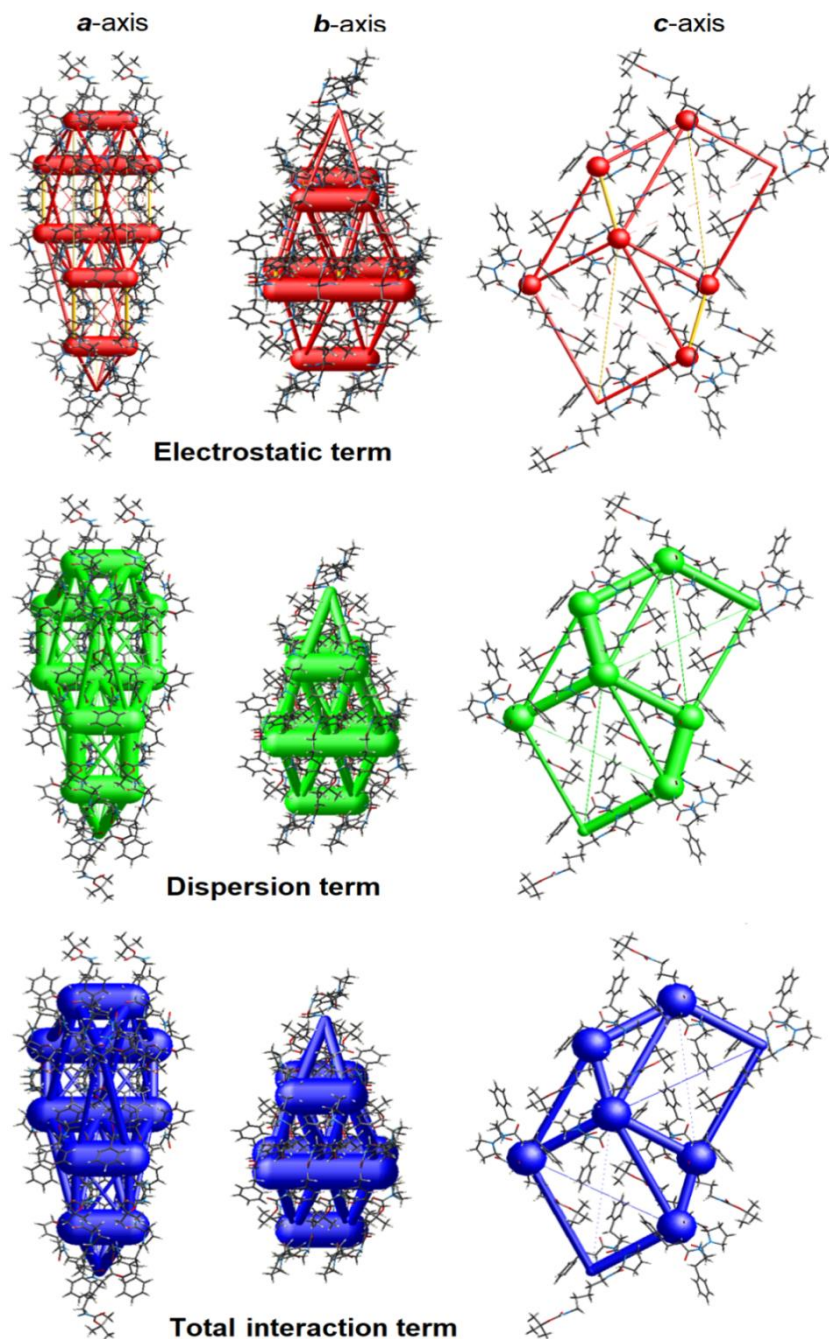

**Figure S10.** Energy frameworks of YEPVIZ corresponding to the electrostatic and dispersion energy components, and the total energy framework along *a*, *b* and *c*-axis. The cylinders thickness shows the relative strength of molecular packing.



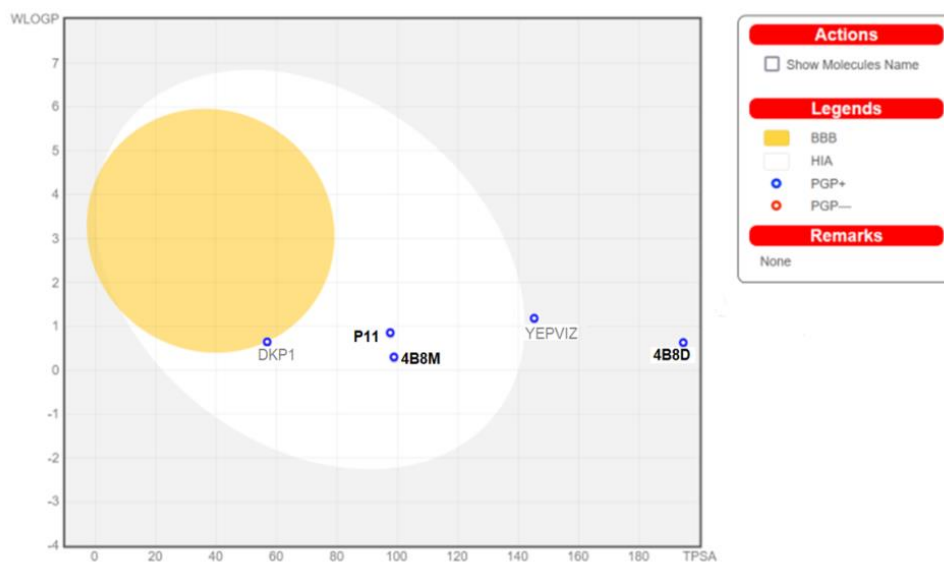

**Figure S11.** Predicted BOILED-Egg diagram of the studied peptides, from SwissADME web tool. \*CLA – outside area of boiled egg.

P11

|                           |     |                                        |
|---------------------------|-----|----------------------------------------|
| Potential cardiotoxic (+) | 50% | Yes<br>(Value= 0.28 and limit = 0.26 ) |
| Strong or Extreme         | 50% |                                        |

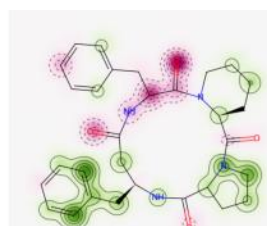

CLA

|                           |     |                                        |
|---------------------------|-----|----------------------------------------|
| Potential cardiotoxic (+) | 50% | Yes<br>(Value= 0.27 and limit = 0.26 ) |
| Strong or Extreme         | 60% |                                        |

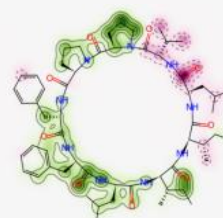

4B8D

|                     |                |                                        |
|---------------------|----------------|----------------------------------------|
| Non-cardiotoxic (-) | 50%            | Yes<br>(Value= 0.28 and limit = 0.26 ) |
| Not applicable      | Not applicable |                                        |

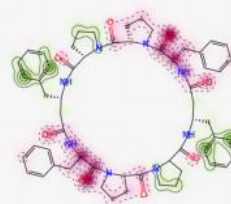

DKP1

|                     |                |                                       |
|---------------------|----------------|---------------------------------------|
| Non-cardiotoxic (-) | 50%            | No<br>(Value= 0.25 and limit = 0.26 ) |
| Not applicable      | Not applicable |                                       |

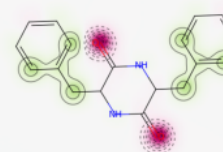

YEPVIZ

|                           |     |                                        |
|---------------------------|-----|----------------------------------------|
| Potential cardiotoxic (+) | 50% | Yes<br>(Value= 0.28 and limit = 0.26 ) |
| Strong or Extreme         | 50% |                                        |

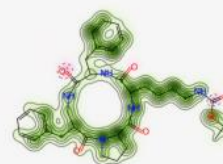



**Figure S12.** Maps of cardiac toxicity in selected compounds.

**Table S1.** Mutation status of key genes involved in cancer-related signaling pathways in DMBC29 cells, for which the PolyPhen-2-based functional effect of a mutation was predicted as possibly/probably damaging [73]. Prediction of functional effects of amino acid substitutions were assessed by using Polyphen-2 software and mutations were marked as homozygous (+/+) or heterozygous (+/-).

| DMBC29       |                                                                  |
|--------------|------------------------------------------------------------------|
| <b>gene</b>  | <b>RTK/RAS signaling pathway</b>                                 |
| <i>BRAF</i>  | V600E +/- probably damaging 0.971                                |
| <i>ERBB2</i> | P1170A +/- possibly damaging 0.953                               |
| <i>FGFR3</i> | P451S +/- possibly damaging 0.902                                |
| <i>FGFR4</i> | G388R +/- probably damaging 0.998                                |
| <b>gene</b>  | <b>WNT/<math>\beta</math>-catenin pathway</b>                    |
| <i>DKK2</i>  | R146 +/- probably damaging 1.000                                 |
| <i>RNF43</i> | L418M +/- probably damaging 0.969                                |
| <b>gene</b>  | <b>HIPPO pathway</b>                                             |
| <i>DCHS2</i> | frameshift variant +/- N1365X                                    |
| <i>WWC1</i>  | Inframe deletion +/- E865del                                     |
| <b>gene</b>  | <b>MYC pathway</b>                                               |
| <i>MGA</i>   | P1523A +/- possibly damaging 0.657                               |
| <b>gene</b>  | <b>NOTCH pathway</b>                                             |
| <i>NCOR2</i> | Inframe insertion +/-1849-1850/SSG; Inframe insertion +/- P511QP |

**Table S2.** Mutation status of key genes involved in cancer-related signaling pathways in DMBC28 cells, for which the PolyPhen-2-based functional effect of a mutation was predicted as possibly/probably damaging [82]. Prediction of functional effects of amino acid substitutions were assessed by using Polyphen-2 software and mutations were marked as homozygous (+/+) or heterozygous (+/-).

| DMBC28       |                                                                  |
|--------------|------------------------------------------------------------------|
| <b>gene</b>  | <b>RTK/RAS signaling pathway</b>                                 |
| <i>BRAF</i>  | V600E +/- probably damaging 0.971                                |
| <i>ERBB2</i> | P1170A +/- possibly damaging 0.953                               |
| <i>FGFR3</i> | P451S +/- possibly damaging 0.902                                |
| <i>FGFR4</i> | G388R +/- probably damaging 0.998                                |
| <i>NF1</i>   | R135W +/- probably damaging 1.000                                |
| <b>gene</b>  | <b>WNT/<math>\beta</math>-catenin pathway</b>                    |
| <i>RNF43</i> | L418M +/- probably damaging 0.969                                |
| <i>DKK2</i>  | R146 +/- probably damaging 1.000                                 |
| <b>gene</b>  | <b>HIPPO pathway</b>                                             |
| <i>CRB2</i>  | G159A +/- possibly damaging 0.610                                |
| <i>DCHS2</i> | frameshift variant +/- N1365X                                    |
| <i>WWC1</i>  | Inframe deletion +/- E865del                                     |
| <b>gene</b>  | <b>MYC pathway</b>                                               |
| <i>MGA</i>   | P1523A +/- possibly damaging 0.657                               |
| <b>gene</b>  | <b>NOTCH pathway</b>                                             |
| <i>NCOR2</i> | Inframe insertion +/-1849-1850/SSG; Inframe insertion +/- P511QP |

**Table S3.** Molecular weights of short peptides and DMSO volume necessary to prepare 20 mM stock solutions.

|    | Symbol    | Sequence of amino acids                                                       | Molecular weight<br>[g/mol] | Mass<br>[mg] | DMSO<br>[μl] |
|----|-----------|-------------------------------------------------------------------------------|-----------------------------|--------------|--------------|
| 1  | 4B8D      | cyclo(Pro-Pro-β <sup>3</sup> homoPhe-Phe-Pro-Pro-β <sup>3</sup> homoPhe-Phe-) | 987.3                       | 1.9          | 96.2         |
| 2  | 4B8M-12   | cyclo(Pro-Pro-β <sup>3</sup> homoPhe-Phe-)                                    | 502.6                       | 2.7          | 268.6        |
| 3  | 4B8M-14   | cyclo(Pro-Pro-β <sup>3</sup> homoPhe-Phe-)                                    | 502.6                       | 3.4          | 338.3        |
| 4  | P0011-6   | cyclo(Pro-Pro-β <sup>3</sup> homoPhe-Phe-)                                    | 502.6                       | 7.3          | 726.2        |
| 5  | P0010-3-3 | cyclo(Pro-Pro-β <sup>3</sup> homoPhe-Phe-)                                    | 502.6                       | 5.1          | 507.4        |
| 6  | DKP1      | cyclo(Phe-Phe-)                                                               | 294.4                       | 3.4          | 577.4        |
| 7  | P11       | cyclo(Pro-homoPro-β <sup>3</sup> homoPhe-Phe-)                                | 516.6                       | 2.0          | 193.5        |
| 8  | P11L      | H-Pro-homoPro-β <sup>3</sup> homoPhe-Phe-OH xTFA                              | 648                         | 2.8          | 216          |
| 9  | P03L      | H-D-Pro-Pro-β <sup>3</sup> homoPhe-Phe-OH x TFA                               | 634.7                       | 2.1          | 165.4        |
| 10 | P04L      | H-Pro-Pro-D-β <sup>3</sup> homoPhe-Phe-OH x TFA                               | 634.7                       | 4.3          | 339          |
| 11 | CLA       | cyclo(Leu-Ile-Ile-Leu-Val-Pro-Pro-Phe-Phe-)                                   | 1040.4                      | 1            | 48           |

**Table S4.** Relevant structure data of the tetrapeptide ring in YEPVIZ (see [66] for atom notation).

| Bond length [Å] | X-ray     | B3LYP  |          |
|-----------------|-----------|--------|----------|
|                 |           | vacuum | solution |
| N3-C8           | 1.436(15) | 1.474  | 1.476    |
| C8-C3           | 1.519(17) | 1.542  | 1.537    |
| C3-N2           | 1.335(14) | 1.355  | 1.349    |
| N2-C1           | 1.448(14) | 1.465  | 1.461    |
| C1-C4           | 1.530(16) | 1.548  | 1.546    |
| C4-N1           | 1.340(15) | 1.360  | 1.353    |
| N1-C2           | 1.460(14) | 1.458  | 1.459    |
| C2-C12          | 1.495(19) | 1.551  | 1.553    |
| C12-N4          | 1.361(19) | 1.360  | 1.352    |
| N4-C10          | 1.445(16) | 1.456  | 1.460    |
| C10-C5          | 1.593(16) | 1.572  | 1.569    |
| C5-C9           | 1.533(17) | 1.524  | 1.526    |
| C9-N3           | 1.324(15) | 1.361  | 1.353    |
| N3-C17          | 1.466(15) | 1.471  | 1.476    |
| C17-C18         | 1.548(2)  | 1.531  | 1.531    |
| C18-C7          | 1.508(2)  | 1.538  | 1.537    |
| C7-C8           | 1.544(2)  | 1.547  | 1.545    |
| C3-O2           | 1.230(15) | 1.226  | 1.233    |
| C4-O3           | 1.214(15) | 1.220  | 1.229    |
| C12-O4          | 1.235(17) | 1.223  | 1.229    |
| C9-O1           | 1.240(16) | 1.235  | 1.240    |

**Table S4.** Cont.

| Bond angle [°] | X-ray     | B3LYP  |          |
|----------------|-----------|--------|----------|
|                |           | vacuum | solution |
| C9-N3-C8       | 118.2(9)  | 118.8  | 119.2    |
| N3-C8-C3       | 108.5(9)  | 108.4  | 108.4    |
| C8-C3-N2       | 117.0(10) | 117.4  | 117.3    |
| C3-N2-C1       | 119.6(9)  | 121.4  | 121.6    |
| N2-C1-C4       | 115.6(9)  | 114.5  | 113.7    |
| C1-C4-N1       | 115.4(10) | 116.9  | 117.1    |
| C4-N1-C2       | 122.0(9)  | 123.0  | 123.8    |
| N1-C2-C12      | 111.0(10) | 111.1  | 111.4    |
| C2-C12-N4      | 118.2(12) | 115.6  | 115.7    |
| C12-N4-C10     | 123.5(11) | 123.4  | 124.2    |
| N4-C10-C5      | 112.3(9)  | 114.2  | 114.0    |
| C10-C5-C9      | 106.2(9)  | 107.7  | 107.5    |
| C5-C9-N3       | 119.4(10) | 118.9  | 118.7    |
| C9-N3-C17      | 126.5(10) | 128.9  | 128.7    |

|            |           |       |       |
|------------|-----------|-------|-------|
| C8-N3-C17  | 115.1(9)  | 112.0 | 112.1 |
| N3-C17-C18 | 101.3(10) | 102.4 | 102.4 |
| C17-C18-C7 | 102.6(11) | 103.2 | 103.4 |
| C18-C7-C8  | 106.3(10) | 104.5 | 104.2 |
| C7-C8-N3   | 101.9(9)  | 103.9 | 104.0 |
| C7-C8-C3   | 113.7(10) | 111.4 | 112.0 |
| C8-C3-O2   | 119.9(11) | 120.1 | 120.7 |
| N2-C3-O2   | 123.1(11) | 122.6 | 122.0 |
| C1-C4-O3   | 119.4(11) | 118.9 | 119.0 |
| N1-C4-O3   | 125.2(11) | 124.2 | 123.9 |
| C2-C12-O4  | 120.4(12) | 121.1 | 120.8 |
| N4-C12-O4  | 121.4(13) | 123.3 | 123.5 |
| C5-C9-O1   | 118.1(11) | 121.0 | 120.5 |
| N3-C9-O1   | 122.1(12) | 119.8 | 120.4 |

**Table S4.** Cont.

| Torsion angle [°] | X-ray      |        | B3LYP    |
|-------------------|------------|--------|----------|
|                   |            | vacuum | solution |
| N3-C8-C3-N2       | -131.4(10) | -127.5 | -127.8   |
| C8-C3-N2-C1       | 175.1(10)  | 177.9  | 178.9    |
| C3-N2-C1-C4       | -54.6(13)  | -64.7  | -61.1    |
| N2-C1-C4-N1       | -29.0(14)  | -22.8  | -27.1    |
| C1-C4-N1-C2       | 178.7(9)   | 176.2  | 178.0    |
| C4-N1-C2-C12      | -127.2(11) | -125.1 | -125.6   |
| N1-C2-C12-N4      | 33.6(15)   | 29.5   | 29.4     |
| C2-C12-N4-C10     | -164.8(11) | -161.5 | -163.6   |
| C12-N4-C10-C5     | 84.0(14)   | 82.7   | 86.1     |
| N4-C10-C5-C9      | 36.4(12)   | 38.4   | 37.2     |
| C10-C5-C9-N3      | 84.3(12)   | 86.6   | 85.8     |
| C5-C9-N3-C8       | -168.8(10) | -162.6 | -163.2   |
| C9-N3-C8-C3       | 62.7(13)   | 60.0   | 60.7     |
| C5-C9-N3-C17      | 15.2(17)   | 11.0   | 15.7     |
| C9-N3-C17-C18     | 155.4(11)  | 160.6  | 157.9    |
| N3-C17-C18-C7     | 33.0(13)   | 36.2   | 35.6     |
| C17-C18-C7-C8     | -35.1(13)  | -34.5  | -35.8    |
| C18-C7-C8-N3      | 22.7(12)   | 19.2   | 21.7     |
| C18-C7-C8-C3      | 139.2(11)  | 135.7  | 138.6    |
| C7-C8-C3-N2       | 116.0(11)  | 118.7  | 118.0    |
| N3-C8-C3-O2       | 47.5(14)   | 52.2   | 50.9     |
| C1-N2-C3-O2       | -3.7(17)   | -1.8   | 0.3      |
| N2-C1-C4-O3       | 151.9(10)  | 158.0  | 153.9    |
| C2-N1-C4-O3       | -2.3(17)   | -4.6   | -3.1     |
| N1-C2-C12-O4      | -146.5(12) | -149.9 | -151.3   |
| C10-N4-C12-O4     | 15.3(19)   | 17.9   | 17.1     |
| C10-C5-C9-O1      | -88.4(12)  | -87.5  | -87.5    |
| C8-N3-C9-O1       | 3.7(16)    | 11.6   | 10.0     |

**Table S5.** NBO atomic charges of YEPVIZ (see [66] for atom notation).

| Atom | vacuum | solvent |
|------|--------|---------|
| O1   | -0.685 | -0.712  |
| N1   | -0.672 | -0.659  |
| O2   | -0.658 | -0.698  |
| N2   | -0.629 | -0.620  |
| N3   | -0.505 | -0.493  |
| O3   | -0.632 | -0.691  |
| O4   | -0.652 | -0.686  |
| N4   | -0.647 | -0.639  |
| C1   | -0.092 | -0.088  |
| C2   | -0.094 | -0.091  |
| C3   | 0.685  | 0.697   |

|     |        |        |
|-----|--------|--------|
| C4  | 0.691  | 0.704  |
| C5  | -0.287 | -0.287 |
| C6  | -0.396 | -0.398 |
| C7  | -0.383 | -0.380 |
| C8  | -0.072 | -0.073 |
| C9  | 0.719  | 0.719  |
| C10 | -0.172 | -0.174 |
| C11 | -0.033 | -0.032 |
| C12 | 0.694  | 0.697  |
| C13 | -0.207 | -0.216 |
| C14 | -0.028 | -0.033 |
| O5  | -0.612 | -0.613 |
| C15 | -0.194 | -0.206 |
| C16 | -0.209 | -0.209 |
| C17 | -0.164 | -0.165 |
| C18 | -0.384 | -0.385 |
| C19 | -0.398 | -0.401 |
| C20 | 0.277  | 0.279  |
| C21 | -0.203 | -0.206 |
| C22 | -0.379 | -0.378 |
| C23 | -0.210 | -0.218 |
| C24 | -0.203 | -0.206 |
| C25 | -0.187 | -0.206 |
| C26 | -0.201 | -0.206 |
| N5  | -0.650 | -0.641 |
| C27 | -0.209 | -0.219 |
| C28 | -0.192 | -0.206 |
| C29 | -0.379 | -0.381 |
| O6  | -0.667 | -0.712 |
| C30 | -0.579 | -0.584 |
| C31 | -0.605 | -0.606 |
| C32 | -0.604 | -0.606 |
| C33 | -0.174 | -0.174 |
| C34 | -0.385 | -0.384 |
| C35 | 0.924  | 0.929  |

**Table S6.** Relevant MO energies (in eV) of the systems under study.

|                         | 4B8M   |          | YEPVIZ |          |
|-------------------------|--------|----------|--------|----------|
|                         | vacuum | solution | vacuum | solution |
| LUMO                    | -0.721 | -0.693   | -0.843 | -0.632   |
| HOMO                    | -6.648 | -6.808   | -6.479 | -6.794   |
| HOMO-1                  | -6.803 | -6.931   | -6.708 | -6.854   |
| HOMO-2                  | -6.879 | -7.018   | -6.801 | -7.082   |
| HOMO-3                  | -6.915 | -7.031   | -6.914 | -7.112   |
| HOMO-LUMO<br>energy gap | 5.926  | 6.115    | 5.636  | 6.163    |

**Table S7.** Selected bond and angles in crystal structure 4B8M (see Fig. 9 for atom notation).

|        |          |         |          |             |            |              |             |
|--------|----------|---------|----------|-------------|------------|--------------|-------------|
| O4-C30 | 1.231(2) | C3-C4   | 1.534(3) | C30-N1-C4   | 130.16(16) | C9-N2-C5-O1  | -176.2(2)   |
| O1-C5  | 1.221(2) | C24-C25 | 1.386(3) | C4-N1-C1    | 109.82(16) | C6-N2-C5-O1  | -15.0(3)    |
| N1-C30 | 1.349(3) | C24-C23 | 1.392(3) | C5-N2-C9    | 126.99(17) | C9-N2-C5-C4  | -1.9(3)     |
| N1-C4  | 1.471(2) | C23-C22 | 1.511(3) | C20-N4-C29  | 119.84(18) | C6-N2-C5-C4  | 159.31(19)  |
| N1-C1  | 1.476(3) | C22-C29 | 1.544(3) | C10-N3-C11  | 122.54(18) | C30-N1-C1-C2 | -155.90(18) |
| N2-C5  | 1.358(3) | C27-C26 | 1.386(3) | O1-C5-N2    | 121.47(18) | C4-N1-C2-C1  | 11.8(2)     |
| N2-C9  | 1.472(3) | C29-C30 | 1.533(3) | N2-C5-C4    | 117.78(17) | C30-N1-C4-C3 | 132.7(2)    |
| N2-C6  | 1.474(3) | C14-C15 | 1.385(4) | C27-C28-C23 | 120.75(19) | C1-N1-C4-C3  | -33.06(18)  |
| O3-C20 | 1.227(3) | C14-C13 | 1.390(3) | C2-C3-C4    | 102.59(16) | C30-N1-C4-C5 | -113.6(2)   |
| N4-C20 | 1.361(3) | C20-C19 | 1.515(3) | N1-C4-C5    | 108.82(15) | C1-N1-C4-C5  | 80.6(2)     |
| N4-C29 | 1.455(3) | C9-C10  | 1.512(4) | C28-C23-C24 | 118.2(2)   | C2-C3-C4-N1  | 40.80(18)   |
| O2-C10 | 1.231(3) | C9-C8   | 1.546(3) | C24-C23-C22 | 121.2(2)   | C2-C3-C4-C5  | -73.46(18)  |
| N3-C10 | 1.335(3) | C12-C13 | 1.509(3) | N4-C29-C30  | 114.97(15) | O1-C5-C4-N1  | -16.2(3)    |
| N3-C11 | 1.449(3) | C12-C11 | 1.540(3) | C30-C29-C22 | 109.71(16) | N2-C5-C4-N1  | 169.44(18)  |

|         |          |         |          |            |            |                 |             |
|---------|----------|---------|----------|------------|------------|-----------------|-------------|
| C5-C4   | 1.548(3) | C26-C25 | 1.377(4) | O4-C30-N1  | 119.82(18) | O1-C5-C4-C3     | 93.0(2)     |
| C1-C2   | 1.532(3) | C6-C7   | 1.511(4) | N1-C30-C29 | 120.09(16) | N2-C5-C4-C3     | -81.4(2)    |
| C28-C27 | 1.386(3) | C13-C18 | 1.392(3) | O3-C20-N4  | 122.8(2)   | C27-C28-C23-C22 | -179.45(18) |
| C28-C23 | 1.389(3) | C19-C11 | 1.539(4) | O2-C10-N3  | 124.9(3)   | C25-C24-C23-C22 | 178.22(18)  |
| C3-C2   | 1.532(3) | C18-C17 | 1.384(4) | N2-C6-C7   | 102.7(2)   | C6-N2-C9-C10    | 114.6(2)    |

**Table S8.** X-H/O $\cdots\pi$  interactions in 4B8M.

|                                  | H/O $\cdots\pi$               | X $\cdots\pi$ | X-H/O $\cdots\pi$ |
|----------------------------------|-------------------------------|---------------|-------------------|
| C7-H7A $\cdots\pi$ <sup>i</sup>  | 2.88                          | 3.714(3)      | 145               |
| C20-O3 $\cdots\pi$ <sup>ii</sup> | 3.688(2)                      | 3.856(2)      | 72.97(13)         |
| (i)                              | -1+x, 1+y, -1+z; (ii) x, y, z |               |                   |

**Table S9.** Supramolecular synthon patterns (< 20-membered motifs) in 4B8M and YEPVIZ.

| 4B8M                             |                                                                                                                                                                                                                                                                                                                                                                                           |
|----------------------------------|-------------------------------------------------------------------------------------------------------------------------------------------------------------------------------------------------------------------------------------------------------------------------------------------------------------------------------------------------------------------------------------------|
| C(4)                             | (NH)N3-H3N $\cdots$ O2(C=O)                                                                                                                                                                                                                                                                                                                                                               |
| C(5)                             | (CH-Pro)C3-H3B $\cdots$ O1(C=O)<br>(CH-Pro)C9-H9 $\cdots$ O1(C=O)                                                                                                                                                                                                                                                                                                                         |
| C(6)                             | (CH-Pro)C3-H3A $\cdots$ O4(C=O)<br>(CH)C19-H19B $\cdots$ O2(C=O)                                                                                                                                                                                                                                                                                                                          |
| C(8)                             | (NH)N4-H4N $\cdots$ O2(C=O)<br>(CH)C28-H28 $\cdots$ O3(C=O)                                                                                                                                                                                                                                                                                                                               |
| C(9)                             | (CH)C26-H26 $\cdots$ O4(C=O)                                                                                                                                                                                                                                                                                                                                                              |
| C(13)                            | (CH)C16-H16 $\cdots$ O4(C=O)                                                                                                                                                                                                                                                                                                                                                              |
| R <sup>1</sup> <sub>2</sub> (8)  | (NH)N3-H3N $\cdots$ O2(C=O) & (NH)N4-H4N $\cdots$ O2(C=O)                                                                                                                                                                                                                                                                                                                                 |
| Level 2                          |                                                                                                                                                                                                                                                                                                                                                                                           |
| C <sup>1</sup> <sub>2</sub> (8)  | (CH)C16-H16 $\cdots$ O4(C=O) & (CH)C26-H26 $\cdots$ O4(C=O)                                                                                                                                                                                                                                                                                                                               |
| C <sup>1</sup> <sub>2</sub> (13) | (CH-Pro)C3-H3A $\cdots$ O4(C=O) & (CH)C26-H26 $\cdots$ O4(C=O)                                                                                                                                                                                                                                                                                                                            |
| C <sup>2</sup> <sub>2</sub> (10) | (NH)N3-H3N $\cdots$ O2(C=O) & (CH)C19-H19B $\cdots$ O2(C=O)<br>(CH-Pro)C3-H3B $\cdots$ O1(C=O) & (CH-Pro)C3-H3A $\cdots$ O4(C=O)<br>(CH-Pro)C3-H3B $\cdots$ O1(C=O) & (CH-Pro)C9-H9 $\cdots$ O1(C=O)                                                                                                                                                                                      |
| C <sup>2</sup> <sub>2</sub> (11) | (NH)N3-H3N $\cdots$ O2(C=O) & (CH-Pro)C9-H9 $\cdots$ O1(C=O)<br>(CH)C26-H26 $\cdots$ O4(C=O) & (CH)C28-H28 $\cdots$ O3(C=O)<br>(CH-Pro)C3-H3B $\cdots$ O1(C=O) & (CH-Pro)C3-H3A $\cdots$ O4(C=O)                                                                                                                                                                                          |
| C <sup>2</sup> <sub>2</sub> (13) | (CH-Pro)C3-H3A $\cdots$ O4(C=O) & (CH-Pro)C9-H9 $\cdots$ O1(C=O)<br>(CH-Pro)C9-H9 $\cdots$ O1(C=O) & (CH)C19-H19B $\cdots$ O2(C=O)                                                                                                                                                                                                                                                        |
| C <sup>2</sup> <sub>2</sub> (14) | (NH)N4-H4N $\cdots$ O2(C=O) & (CH-Pro)C3-H3B $\cdots$ O1(C=O)<br>(NH)N4-H4N $\cdots$ O2(C=O) & (CH)C19-H19B $\cdots$ O2(C=O)                                                                                                                                                                                                                                                              |
| C <sup>2</sup> <sub>2</sub> (15) | (NH)N4-H4N $\cdots$ O2(C=O) & (CH-Pro)C9-H9 $\cdots$ O1(C=O)<br>(NH)N4-H4N $\cdots$ O2(C=O) & (CH)C16-H16 $\cdots$ O4(C=O)<br>(NH)N3-H3N $\cdots$ O2(C=O) & (CH-Pro)C3-H3B $\cdots$ O1(C=O)<br>(CH-Pro)C3-H3A $\cdots$ O4(C=O) & (CH)C26-H26 $\cdots$ O4(C=O)                                                                                                                             |
| C <sup>2</sup> <sub>2</sub> (16) | (NH)N4-H4N $\cdots$ O2(C=O) & (CH)C28-H28 $\cdots$ O3(C=O)<br>(CH-Pro)C3-H3A $\cdots$ O4(C=O) & (CH)C28-H28 $\cdots$ O3(C=O)<br>(CH)C19-H19B $\cdots$ O2(C=O) & (CH)C28-H28 $\cdots$ O3(C=O)<br>(CH-Pro)C3-H3B $\cdots$ O1(C=O) & (CH)C19-H19B $\cdots$ O2(C=O)<br>(CH-Pro)C3-H3A $\cdots$ O4(C=O) & (CH)C16-H16 $\cdots$ O4(C=O)                                                         |
| C <sup>2</sup> <sub>2</sub> (17) | (NH)N4-H4N $\cdots$ O2(C=O) & (CH-Pro)C3-H3A $\cdots$ O4(C=O)<br>(CH)C26-H26 $\cdots$ O4(C=O) & (CH)C28-H28 $\cdots$ O3(C=O)<br>(CH)C16-H16 $\cdots$ O4(C=O) & (CH)C28-H28 $\cdots$ O3(C=O)<br>(CH-Pro)C9-H9 $\cdots$ O1(C=O) & (CH)C16-H16 $\cdots$ O4(C=O)<br>(CH)C16-H16 $\cdots$ O4(C=O) & (CH)C19-H19B $\cdots$ O2(C=O)                                                              |
| C <sup>2</sup> <sub>2</sub> (18) | (NH)N4-H4N $\cdots$ O2(C=O) & (CH)C26-H26 $\cdots$ O4(C=O)<br>(NH)N3-H3N $\cdots$ O2(C=O) & (CH)C28-H28 $\cdots$ O3(C=O)<br>(NH)N3-H3N $\cdots$ O2(C=O) & (CH-Pro)C3-H3A $\cdots$ O4(C=O)<br>(NH)N3-H3N $\cdots$ O2(C=O) & (CH)C16-H16 $\cdots$ O4(C=O)<br>(CH-Pro)C3-H3B $\cdots$ O1(C=O) & (CH)C26-H26 $\cdots$ O4(C=O)<br>(CH)C16-H16 $\cdots$ O4(C=O) & (CH)C19-H19B $\cdots$ O2(C=O) |
| C <sup>2</sup> <sub>2</sub> (19) | (NH)N4-H4N $\cdots$ O2(C=O) & (CH)C26-H26 $\cdots$ O4(C=O)<br>(NH)N3-H3N $\cdots$ O2(C=O) & (CH)C16-H16 $\cdots$ O4(C=O)<br>(CH-Pro)C3-H3B $\cdots$ O1(C=O) & (CH)C28-H28 $\cdots$ O3(C=O)<br>(CH-Pro)C3-H3B $\cdots$ O1(C=O) & (CH)C16-H16 $\cdots$ O4(C=O)                                                                                                                              |



|                     |                                                                                                                                                                                  |
|---------------------|----------------------------------------------------------------------------------------------------------------------------------------------------------------------------------|
|                     | (CH-Pro) <b>C3-H3A</b> ...O4(C=O) & (CH)C19-H19B...O2(C=O)<br>(CH-Pro) <b>C3-H3A</b> ...O4(C=O) & (CH)C16-H16...O4(C=O)                                                          |
| C <sub>2</sub> (20) | (NH) <b>N4-H4N</b> ...O2(C=O) & (CH)C16-H16...O4(C=O)<br>(CH-Pro) <b>C9-H9</b> ...O1(C=O) & (CH)C26-H26...O4(C=O)<br>(CH)C19-H19B...O2(C=O) & (CH)C26-H26...O4(C=O)              |
| R <sub>1</sub> (6)  | (NH) <b>N4-H4N</b> ...O2(C=O) & (CH)C19-H19B...O2(C=O)<br>(NH) <b>N3-H3N</b> ...O2(C=O) & (CH)C19-H19B...O2(C=O)                                                                 |
| R <sub>1</sub> (8)  | (CH-Pro) <b>C3-H3B</b> ...O1(C=O) & (CH-Pro) <b>C9-H9</b> ...O1(C=O)                                                                                                             |
| R <sub>2</sub> (9)  | (CH-Pro) <b>C3-H3B</b> ...O1(C=O) & (CH-Pro) <b>C3-H3A</b> ...O4(C=O)                                                                                                            |
| R <sub>2</sub> (11) | (NH) <b>N3-H3N</b> ...O2(C=O) & (CH-Pro) <b>C9-H9</b> ...O1(C=O)                                                                                                                 |
| R <sub>2</sub> (12) | (NH) <b>N4-H4N</b> ...O2(C=O) & (CH-Pro) <b>C9-H9</b> ...O1(C=O)                                                                                                                 |
| R <sub>2</sub> (13) | (NH) <b>N4-H4N</b> ...O2(C=O) & (CH-Pro) <b>C3-H3A</b> ...O4(C=O)<br>(CH-Pro) <b>C3-H3A</b> ...O4(C=O) & (CH-Pro) <b>C9-H9</b> ...O1(C=O)                                        |
| R <sub>2</sub> (14) | (NH) <b>N4-H4N</b> ...O2(C=O) & (CH)C28-H28...O3(C=O)                                                                                                                            |
| R <sub>2</sub> (15) | (NH) <b>N3-H3N</b> ...O2(C=O) & (CH-Pro) <b>C3-H3B</b> ...O1(C=O)<br>(CH-Pro) <b>C3-H3A</b> ...O4(C=O) & (CH)C19-H19B...O2(C=O)                                                  |
| R <sub>2</sub> (16) | (NH) <b>N4-H4N</b> ...O2(C=O) & (CH-Pro) <b>C3-H3B</b> ...O1(C=O)<br>(CH-Pro) <b>C3-H3A</b> ...O4(C=O) & (CH)C28-H28...O3(C=O)<br>(CH)C19-H19B...O2(C=O) & (CH)C28-H28...O3(C=O) |
| R <sub>2</sub> (17) | (NH) <b>N3-H3N</b> ...O2(C=O) & (CH-Pro) <b>C3-H3A</b> ...O4(C=O)<br>(CH-Pro) <b>C3-H3B</b> ...O1(C=O) & (CH)C19-H19B...O2(C=O)                                                  |
| R <sub>2</sub> (18) | (NH) <b>N3-H3N</b> ...O2(C=O) & (CH)C28-H28...O3(C=O)<br>(CH-Pro) <b>C9-H9</b> ...O1(C=O) & (CH)C28-H28...O3(C=O)                                                                |
| R <sub>2</sub> (19) | (CH)C3-H3B...O1(C=O) & (CH)C28-H28...O3(C=O)<br>(CH-Pro) <b>C9-H9</b> ...O1(C=O) & (CH)C19-H19B...O2(C=O)                                                                        |
|                     |                                                                                                                                                                                  |
| <b>YEPVIZ</b>       |                                                                                                                                                                                  |
| S(6)                | (CH)C34-H37...O6(C=O)                                                                                                                                                            |
| S(7)                | (CH)C6-H7...O4(C=O)                                                                                                                                                              |
| S(9)                | (NH) <b>N1-H1</b> ...O1(C=O)<br>(NH) <b>N4-H3</b> ...O2(C=O)                                                                                                                     |
| C(5)                | (NH) <b>N2-H2</b> ...O3(C=O)                                                                                                                                                     |
| C(7)                | (CH-Pro) <b>C8-H8</b> ...O4(C=O)<br>(CH-Pro) <b>C8-H11</b> ...O3(C=O)                                                                                                            |
| C(8)                | (CH)C2-H5...O1(C=O)                                                                                                                                                              |
| Level 2             |                                                                                                                                                                                  |
| C <sub>2</sub> (12) | (NH) <b>N2-H2</b> ...O3(C=O) & (CH-Pro) <b>C8-H11</b> ...O3(C=O)                                                                                                                 |
| C <sub>2</sub> (15) | (NH)C2-H5...O1(C=O) & (CH-Pro) <b>C8-H8</b> ...O4(C=O)                                                                                                                           |
| C <sub>2</sub> (16) | (NH) <b>N2-H2</b> ...O3(C=O) & (CH)C2-H5...O1(C=O)                                                                                                                               |
|                     |                                                                                                                                                                                  |
| C <sub>2</sub> (18) | (NH) <b>N2-H2</b> ...O3(C=O) & (CH)C6-H8...O4(C=O)<br>(NH-Pro) <b>C8-H11</b> ...O3(C=O) & (CH)C2-H5...O1(C=O)                                                                    |
| C <sub>2</sub> (19) | (CH-Pro) <b>C8-H8</b> ...O4(C=O) & (CH-Pro) <b>C8-H11</b> ...O3(C=O)                                                                                                             |
| R <sub>1</sub> (6)  | (NH) <b>N2-H2</b> ...O3(C=O) & (CH-Pro) <b>C8-H11</b> ...O3(C=O)                                                                                                                 |
| R <sub>2</sub> (9)  | (NH)C2-H5...O1(C=O) & (CH-Pro) <b>C8-H8</b> ...O4(C=O)                                                                                                                           |
| R <sub>2</sub> (10) | (CH-Pro) <b>C8-H11</b> ...O3(C=O) & (CH)C2-H5...O1(C=O)                                                                                                                          |
| R <sub>2</sub> (12) | (NH) <b>N2-H2</b> ...O3(C=O) & (CH)C2-H5...O1(C=O)<br>(NH) <b>N2-H2</b> ...O3(C=O) & (CH)C6-H8...O4(C=O)                                                                         |
| R <sub>2</sub> (13) | (CH-Pro) <b>C8-H8</b> ...O4(C=O) & (CH-Pro) <b>C8-H11</b> ...O3(C=O)                                                                                                             |

**Table S10.** Major interactions, Hirshfeld contact surfaces and enrichment ratio (ER) for 4B8M and YEPVIZ (for > 0.5).

| Interactions   | 4B8M  | YEPVIZ |       |       |      |       |      |       |  |      |
|----------------|-------|--------|-------|-------|------|-------|------|-------|--|------|
| Surface (%)    |       | H      |       | O     |      | C     |      | N     |  |      |
|                | 82.75 |        | 85.05 | 10.65 | 7.6  | 6.4   | 5.7  | -     |  | 0.6  |
| Major contacts |       | H...H  |       | O...H |      | C...H |      | N...H |  |      |
| Proportion (%) | 65.7  |        | 71.1  | 65.7  | 15.2 | 12.8  | 11.5 | -     |  | 1.2  |
| ER             | 0.96  |        | 1.17  | 1.21  | 1.17 | 1.21  | 1.17 | -     |  | 1.17 |

**Table S11.** ADMET parameters in synthesized compounds.

| Physicochemical properties |
|----------------------------|
|----------------------------|

| <i>Peptide ranker score</i> | formula                                                       | Mol. weight [g/mol] | Num. Heavy atoms | Num. Arom. Heavy atoms | Fraction Csp <sup>3</sup> | Num. Rotatable bonds | Num. H-bond acceptors | Num. H-bonds donors | Molar refractivity | TPSA* [Å <sup>2</sup> ] |
|-----------------------------|---------------------------------------------------------------|---------------------|------------------|------------------------|---------------------------|----------------------|-----------------------|---------------------|--------------------|-------------------------|
| 4B8M<br>0.98292             | C <sub>29</sub> H <sub>34</sub> N <sub>4</sub> O <sub>4</sub> | 502.60              | 37               | 12                     | 0.45                      | 4                    | 4                     | 2                   | 154.32             | 98.82                   |
| P11<br>0.9469               | C <sub>30</sub> H <sub>36</sub> N <sub>4</sub> O <sub>4</sub> | 516.63              | 38               | 12                     | 0.47                      | 4                    | 4                     | 2                   | 159.13             | 98.82                   |
| CLA<br>0.91503              | C <sub>57</sub> H <sub>85</sub> N <sub>9</sub> O <sub>9</sub> | 1040.34             | 75               | 12                     | 0.63                      | 13                   | 9                     | 7                   | 323.50             | 244.32                  |
| 4B8D<br>0.01823             | C <sub>58</sub> H <sub>68</sub> N <sub>8</sub> O <sub>8</sub> | 1005.21             | 74               | 24                     | 0.45                      | 8                    | 8                     | 4                   | 308.64             | 197.64                  |
| DKP1<br>0.98537             | C <sub>18</sub> H <sub>18</sub> N <sub>2</sub> O <sub>2</sub> | 294.35              | 22               | 12                     | 0.22                      | 4                    | 2                     | 2                   | 91.65              | 58.20                   |
| YEPVIZ                      | C <sub>35</sub> H <sub>47</sub> N <sub>5</sub> O <sub>6</sub> | 633.78              | 46               | 12                     | 0.51                      | 12                   | 6                     | 4                   | 189.70             | 145.94                  |

\*TPSA - topological polar surface area

| Lipophilicity |                                     |                                      |                                     |                                     |                                          |                                       |
|---------------|-------------------------------------|--------------------------------------|-------------------------------------|-------------------------------------|------------------------------------------|---------------------------------------|
|               | Log <i>P</i> <sub>o/w</sub> (iLOGP) | Log <i>P</i> <sub>o/w</sub> (XLOGP3) | Log <i>P</i> <sub>o/w</sub> (WLOGP) | Log <i>P</i> <sub>o/w</sub> (MLOGP) | Log <i>P</i> <sub>o/w</sub> (SILICOS-IT) | Consensus log <i>P</i> <sub>o/w</sub> |
| 4B8M          | 3.88                                | 2.71                                 | 0.30                                | 1.70                                | 2.32                                     | 2.18                                  |
| P11           | 3.27                                | 3.07                                 | 0.69                                | 1.89                                | 2.56                                     | 2.30                                  |
| CLA           | 6.15                                | 7.76                                 | 0.27                                | 0.59                                | 4.88                                     | 3.93                                  |
| 4B8D          | 5.24                                | 5.42                                 | 0.61                                | 1.45                                | 3.51                                     | 3.25                                  |
| DKP1          | 2.23                                | 1.59                                 | 0.69                                | 1.93                                | 2.98                                     | 1.89                                  |
| YEPVIZ        | 3.61                                | 3.78                                 | 1.35                                | 1.65                                | 3.56                                     | 2.79                                  |

LogP represents the n-octanol/water *partition* coefficient  
MLogP - Moriguchi model of octanol-water *partition* coefficient

| Water solubility |            |   |                           |                    |             |                           |                    |                    |                           |                |
|------------------|------------|---|---------------------------|--------------------|-------------|---------------------------|--------------------|--------------------|---------------------------|----------------|
|                  | Log (ESOL) | S | Solubility [mg/ml; mol/l] | class              | Log S (Ali) | Solubility [mg/ml; mol/l] | class              | Log S (SILICOS-IT) | Solubility [mg/ml; mol/l] | class          |
| 4B8M             | -4.64      |   | 1.15e-02; 2.29e-05        | moderately soluble | -4.44       | 1.83e-02; 3.64e-05        | Moderately soluble | -7.12              | 3.85e-05; 7.66e-08        | poorly soluble |
| P11              | -4.95      |   | 5.84e-03; 1.13e-05        | moderately soluble | -4.81       | 7.96e-03; 1.54e-05        | Moderately soluble | -7.38              | 2.16e-05; 4.18e-08        | poorly soluble |
| CLA              | -10.44     |   | 3.78e-08; 3.64e-11        | insoluble          | -12.73      | 1.92e-10; 1.84e-13        | insoluble          | -13.07             | 8.75e-11; 8.41e-14        | insoluble      |
| 4B8D             | -9.20      |   | 6.36e-07; 6.33e-10        | poorly soluble     | -9.33       | 4.75e-07; 4.72e-10        | poorly soluble     | -13.77             | 1.71e-11; 1.71e-14        | insoluble      |
| DKP1             | -2.81      |   | 4.60e-01; 1.56e-03        | soluble            | -2.42       | 1.11e+00; 3.77e-03        | soluble            | -6.24              | 1.68e-04; 5.70e-07        | poorly soluble |
| YEPVIZ           | -5.55      |   | 1.78e-04; 2.89e-07        | moderately soluble | -6.54       | 1.83e-04; 2.89e-07        | poorly soluble     | -9.40              | 2.49e-07; 3.94e-10        | poorly soluble |

| Pharmacokinetics |               |              |                |                  |                   |                  |                  |                  |                                 |
|------------------|---------------|--------------|----------------|------------------|-------------------|------------------|------------------|------------------|---------------------------------|
|                  | GI absorption | BBB permeant | P-gp substrate | CYP1A2 inhibitor | CYP2C19 inhibitor | CYP2C9 inhibitor | CYP2D6 inhibitor | CYP3A4 inhibitor | Log Kp (skin permeation) [cm/s] |
| 4B8M             | high          | no           | yes            | no               | no                | no               | yes              | yes              | -7.44                           |
| P11              | high          | no           | yes            | no               | no                | no               | no               | yes              | -7.27                           |
| CLA              | low           | no           | yes            | no               | no                | no               | no               | no               | -7.14                           |
| 4B8D             | low           | no           | yes            | no               | no                | no               | no               | yes              | -8.58                           |
| DKP1             | high          | no           | yes            | no               | no                | no               | yes              | no               | -6.97                           |
| YEPVIZ           | low           | no           | yes            | no               | no                | no               | no               | yes              | -7.48                           |

GI - gastrointestinal absorption, BBB - blood-brain barrier penetration, CYP - cytochrome P450

| Druglikeness |                  |                  |                  |                 |                  |                       |
|--------------|------------------|------------------|------------------|-----------------|------------------|-----------------------|
|              | Lipinski         | Ghose            | Veber            | Egan            | Muegge           | Bioavailability score |
| 4B8M         | yes, 1 violation | no, 3 violations | yes              | yes             | yes              | 0.55                  |
| P11          | yes, 1 violation | no, 3 violations | yes              | yes             | yes              | 0.55                  |
| CLA          | no, 3 violations | no, 3 violations | no, 2 violations | no, 1 violation | no, 4 violations | 0.17                  |
| 4B8D         | no, 2 violations | no, 3 violations | no, 1 violation  | no, 1 violation | no, 4 violations | 0.17                  |
| DKP1         | no, 0 violation  | yes              | yes              | yes             | yes              | 0.55                  |

|        |                  |                  |                  |                 |                 |      |
|--------|------------------|------------------|------------------|-----------------|-----------------|------|
| YEPVIZ | no, 2 violations | no, 3 violations | no, 2 violations | no, 1 violation | no, 1 violation | 0.17 |
|--------|------------------|------------------|------------------|-----------------|-----------------|------|

  

| Medicinal chemistry |         |         |                  |                         |
|---------------------|---------|---------|------------------|-------------------------|
|                     | PAINS   | Brenk   | Leadlikeness     | Synthetic accessibility |
| 4B8M                | 0 alert | 0 alert | no, 1violation   | 4.85                    |
| P11                 | 0 alert | 0 alert | no, 1violation   | 5.00                    |
| CLA                 | 0 alert | 0 alert | no, 3 violations | 9.08                    |
| 4B8D                | 0 alert | 0 alert | no, 3 violations | 8.28                    |
| DKP1                | 0 alert | 0 alert | yes              | 2.63                    |
| YEPVIZ              | 0 alert | 0 alert | no, 3violation   | 5.96                    |

*PAINS* pan-assay interference substructures

**Table S12.** ADMET parameters for studied peptides (from pkcsn web-tool).

| Model name                        | 4B8M   | P11    | CLA    | 4B8D   | DKP1   | YEPVIZ | unit                              |
|-----------------------------------|--------|--------|--------|--------|--------|--------|-----------------------------------|
| <b>ABSORPTION</b>                 |        |        |        |        |        |        |                                   |
| Water solubility                  | -3.373 | -3.438 | -2.935 | -2.905 | -3.398 | -4.176 | log mol/L                         |
| Caco2 permeability                | 0.875  | 0.936  | 0.595  | 0.659  | 1.239  | 0.551  | log Papp in 10 <sup>-6</sup> cm/s |
| Intestinal absorption (human)     | 74.328 | 75.16  | 39.327 | 53.449 | 96.366 | 59.305 | % absorbed                        |
| Skin permeability                 | -2.805 | -2.801 | -2.735 | -2.735 | -2.887 | -2.736 | log Kp                            |
| P-glycoprotein substrate          | yes    | yes    | yes    | yes    | yes    | yes    | yes/no                            |
| P-glycoprotein I inhibitor        | yes    | yes    | yes    | yes    | no     | yes    | yes/no                            |
| P-glycoprotein II inhibitor       | yes    | yes    | yes    | yes    | no     | yes    | yes/no                            |
| <b>DISTRIBUTION</b>               |        |        |        |        |        |        |                                   |
| VDss (human)                      | 0.729  | 0.757  | 0.633  | 0.298  | 0.014  | -0.076 | log L/kg                          |
| Fraction unbound (human)          | 0.142  | 0.128  | 0.147  | 0.167  | 0.108  | 0      | (Fu)                              |
| BBB permeability                  | -0.292 | -0.315 | -1.163 | -0.501 | 0.08   | -0.676 | log BB                            |
| CNS permeability                  | -2.58  | -2.489 | -2.869 | -3.246 | -2.364 | -3.083 | log PS                            |
| <b>METABOLISM</b>                 |        |        |        |        |        |        |                                   |
| CYP2D6 substrate                  | no     | no     | no     | no     | no     | no     | yes/no                            |
| CYP3A4 substrate                  | yes    | yes    | no     | yes    | yes    | yes    | yes/no                            |
| CYP1A2 inhibitor                  | no     | no     | no     | no     | yes    | no     | yes/no                            |
| CYP2C19 inhibitor                 | no     | no     | no     | no     | yes    | no     | yes/no                            |
| CYP2C9 inhibitor                  | no     | no     | no     | no     | no     | no     | yes/no                            |
| CYP2D6 inhibitor                  | no     | no     | no     | no     | no     | no     | yes/no                            |
| CYP3A4 inhibitor                  | yes    | yes    | no     | yes    | no     | yes    | yes/no                            |
| <b>EXCRETION</b>                  |        |        |        |        |        |        |                                   |
| Total clearance                   | 0.695  | 0.692  | -0.017 | -0.243 | 0.32   | 0.472  | log ml/min/kg                     |
| Renal OCT2 substrate              | yes    | yes    | no     | no     | no     | no     | yes/no                            |
| <b>TOXICITY</b>                   |        |        |        |        |        |        |                                   |
| AMES toxicity                     | no     | no     | no     | no     | no     | no     | yes/no                            |
| max. tolerated dose (human)       | -1.374 | -1.379 | 0.466  | 0.418  | -0.304 | -0.719 | log mg/kg/day                     |
| hERG I inhibitor                  | no     | no     | no     | no     | no     | no     | yes/no                            |
| hERG II inhibitor                 | yes    | yes    | yes    | yes    | yes    | yes    | yes/no                            |
| Oral rat acute toxicity (LD50)    | 2.504  | 2.532  | 2.628  | 2.547  | 2.127  | 3.653  | mol/kg                            |
| Oral rat chronic toxicity (LOAEL) | 1.896  | 1.765  | 5.027  | 3.4    | 1.374  | 1.694  | log mg/kg_bw/day                  |
| hepatotoxicity                    | yes    | yes    | yes    | yes    | no     | yes    | yes/no                            |
| Skin sensitisation                | no     | no     | no     | no     | no     | no     | yes/no                            |
| T. Pyriformis toxicity            | 0.34   | 0.335  | 0.285  | 0.285  | 1.004  | 0.286  | log ug/L                          |
| Minnow toxicity                   | 3.312  | 3.195  | 10.603 | 5.38   | 0.625  | 3.788  | log mM                            |

**Table S13.** The probability values related to the confidence level of mutagenicity, carcinogenicity, hepatotoxicity and estrogenicity in relation to synthesized peptides.

|      | mutagenicity | carcinogenicity | hepatotoxicity | estrogenicity |
|------|--------------|-----------------|----------------|---------------|
| 4B8M | 17           | 40              | 50             | 7             |
| P11  | 25           | 36              | 51             | 7             |
| CLA  | 14           | 40              | 75             | 8             |

|        |    |    |    |    |
|--------|----|----|----|----|
| 4B8D   | 20 | 35 | 50 | 13 |
| DKP1   | 21 | 33 | 60 | 5  |
| YEPVIZ | 26 | 38 | 65 | 6  |

**Table S14.** Cytotoxicity for tumor human cell lines in terms of analysed peptides.

|        | Pa    | Pi    | Cell-line  | Cell-line<br>name         | full | tissue | Tumor type     |
|--------|-------|-------|------------|---------------------------|------|--------|----------------|
| 4B8M   | 0.546 | 0.016 | A498       | renal carcinoma           |      | kidney | carcinoma      |
|        | 0.526 | 0.013 | BT-549     | breast ductal carcinoma   |      | breast | carcinoma      |
| P11    | 0.526 | 0.018 | A498       | renal carcinoma           |      | kidney | carcinoma      |
|        | 0.514 | 0.014 | BT-549     | breast ductal carcinoma   |      | breast | carcinoma      |
| CLA    | 0.635 | 0.010 | MDA-MB-231 | breast adenocarcinoma     |      | breast | adenocarcinoma |
|        | 0.581 | 0.005 | NCI-H187   | small cell lung carcinoma |      | lung   | carcinoma      |
| 4B8D   | 0.557 | 0.014 | SF-268     | glioblastoma              |      | brain  | glioblastoma   |
|        | 0.523 | 0.030 | DMS-114    | lung carcinoma            |      | lung   | carcinoma      |
|        | 0.546 | 0.016 | A498       | renal carcinoma           |      | kidney | carcinoma      |
|        | 0.526 | 0.013 | BT-549     | breast ductal carcinoma   |      | breast | carcinoma      |
| DKP1   | 0.621 | 0.21  | Hs683      | oligodendroglioma         |      | brain  | glioma         |
|        | 0.516 | 0.011 | NCI-H187   | small cel lung carcinoma  |      | lung   | carcinoma      |
| YEPVIZ | 0.560 | 0.019 | MDA-MB-231 | breast adenocarcinoma     |      | breast | adenocarcinoma |

**Table S15.** Bioactivity scores of the studied peptide molecules calculated on the basis of GPCR ligand, ion channel modulator, kinase inhibitor, nuclear receptor ligand, protease inhibitor, enzyme inhibitor interactions.

|        | GPCR<br>ligand | Ion channel<br>modulator | Kinase<br>inhibitor | Nuclear<br>receptor<br>ligand | Protease<br>inhibitor | Enzyme<br>inhibitor |
|--------|----------------|--------------------------|---------------------|-------------------------------|-----------------------|---------------------|
| 4B8M   | 0.33           | 0.02                     | -0.02               | -0.00                         | 0.52                  | 0.12                |
| P11    | 0.39           | -0.01                    | -0.06               | -0.16                         | 0.58                  | 0.14                |
| CLA    | -3.69          | -3.80                    | -3.80               | -3.81                         | -3.54                 | -3.74               |
| 4B8D   | -3.67          | -3.79                    | -3.79               | -3.80                         | -3.54                 | -3.73               |
| DKP1   | 0.21           | 0.09                     | -0.02               | -0.05                         | 0.33                  | 0.09                |
| YEPVIZ | 0.20           | -0.56                    | -0.48               | -0.40                         | 0.65                  | -0.21               |
